# Supplementary material for: Linker and N-Terminal Domain Engineering of Pyrrolysyl-tRNA Synthetase for Substrate Range Shifting and Activity Enhancement
Source: PubMed Central journal article supplement (PMC7156790; doi:10.3389/fbioe.2020.00235), 2020-04-07
Supplement: Data_Sheet_1.pdf [file Data_Sheet_1.pdf]

## **Linker and N-terminal domain engineering of pyrrolysyl-tRNA synthetase for substrate range shifting and activity enhancement**

**Han-Kai Jiang<sup>1,2,3</sup>, Man-Nee Lee<sup>1</sup>, Jo-Chu Tsou<sup>1</sup>, Kuan-Wen Chang<sup>1</sup>, Hsueh-Wei Tseng<sup>1</sup>, Kuang-Po Chen<sup>4</sup>, Yaw-Kuen Li<sup>4</sup> and Yane-Shih Wang<sup>1,2,5\*</sup>**

<sup>1</sup> Institute of Biological Chemistry, Academia Sinica, Taipei, Taiwan, <sup>2</sup> Chemical Biology and Molecular Biophysics Program, Taiwan International Graduate Program, Academia Sinica, Taipei, Taiwan, <sup>3</sup> Department of Chemistry, National Tsing Hua University, Hsinchu, Taiwan, <sup>4</sup> Department of Applied Chemistry, National Chiao Tung University, Hsinchu, Taiwan, <sup>5</sup> Institute of Biochemical Sciences, National Taiwan University, Taipei, Taiwan

**\* Correspondence:**

Yane-Shih Wang

yaneshihwang@gate.sinica.edu.tw

## SUPPLEMENTARY MATERIALS

### Table of contents

|                                                                   |    |
|-------------------------------------------------------------------|----|
| 1. DNA and Protein Sequences .....                                | 3  |
| 2. Primers list .....                                             | 4  |
| 3. Supplementary Figures.....                                     | 5  |
| 4. Table S1. Chemical Names and Structures in ncAAs Library ..... | 34 |
| 5. Table S2. Arrangement of ncAAs Library .....                   | 64 |

## 1. DNA and Protein Sequences

### *MmPylRS:*

atggataaaaaaccactaaacactctgataatctgcaaccgggctctggatgtccaggaccggaacaattcataaaaaataaacaccacgaagt  
ctctcgaagcaaaatctatattgaaatggcatgaggagaccacctgtgtgtaaacactccaggagcagcaggactgcaagagcgtcaggc  
accacaaatacaggaagacctgcaaacgctgcaagggttcggatgaggatctcaataaagtctcacaagaaggcaaacgaagaccagacaa  
gcgtaaaagtcaaggctgtttctgccctaccagaacgaaaaaggcaatgccaaaaatccgtgagagaccccgaaacctctgagaatac  
agaagcggcacaggctcaacctctggatctaaatcttaccctgcataccgggttccaccaagagtcagttctgtccggcatctgtttcaac  
atcaatataaagcatttctacaggagcaactgcatccgcaactgtaaaagggaatacgaacccattacatccatgtctgccctgttcaggca  
agtcccccgcaacttacgaagagccagactgacaggcttgaagtctgttaaacccaaaagatgagatttccctgaattccggcaagccttcc  
agggagcttgagtcgaattgctctctcgcagaaaaaagacctgcagcagatctacgcggaagaaagggagaattatctggggaactcg  
agcgtgaaattaccagggttcttggacaggggtttctggaataaaatccccgatcctgatccctcttgagtatategaaaggatgggcattg  
ataatgataccgaacttcaaaaacagatctcaggggtgacaagaacttctgctgagaccatgcttgcctcaaacctttacaactacctgccc  
aagctgacagggccctgctgatccaataaaaatgttgaataggccatgctacagaaaagagtcggacggcaagaacacctcgaag  
agtttaccatgctgaacttctccagatgggatgggatgcacacgggaaaaatcttgaagcataattacggacttctgaaccacctgggaat  
tgattcaagatcgtaggcgattctgcatggctatggggatacccttgatgtaatgcacggagacctggaacttctctgagtagtcggacc  
cataccgcttgaaccgggaatggggattgataaacctggatagggcgaggttccggctcgaacgccttctaaagggttaaacacgactttaa  
aatatcaagagagctgcaaggctcagcttactataacgggatttctaccaacctgtaa

### *tRNA<sup>Pyl</sup><sub>CUA</sub>:*

ggaaacctgatcatgtagatcgaatggactct**ta**aatccgttcagccgggttagattcccgggggttccgcca

The anticodon CTA is labeled in bold type.

### *sfGFP:*

atgagcaagggcgaagaactgtttacgggcgtggtgccgattctgggtggaactggatggtgatgtcaatggtcacaaattcagcgtgcgccc  
gaagggaagggcgtgcaaccaatgtaaaactgacgctgaagttatattgcaccacgggtaaaactgccgggtccgtggccgacctggtcacc  
acgctgacgtatggtgttcaggtttcagctgttaccggatcacatgaaacgccacgacttttcaagtccgcgatgccggaaggttatgtccaa  
gaacgtaccatctcattaaagatgacggcacctacaaaaacgcgcgccgaagtgaattcgaaggtgatacgtggttaaccgtattgaactg  
aaaggcagcattttaaaggaagacggtaatattctgggcataaaactggaatataactcaattcgcacaacgtgtacatcaccgcagataag  
cagaagaacggatcaaggctaactcaagatccgccataatgtggaagatggcagcgttcaactggccgaccactatcagcaaaaacacc  
cgattggtgatggccggctctgctccggacaatcattacctgagcacgcagctgtgctgagtaaagatccgaacgaaaagcgtgaccac  
atggtcctgctggaattcgtgaccgcccggcgcacgcacggatggacgaactgtataaaggctcagagctccatcaccatcaccatcac  
taa

### *MmPylRS:*

MDKKPLNTLISATGLWMSRTGTIHKIKHHEVSRSKIYIEMACGDHLVVNNSRSSRTARAL**RHH**  
KYRKTCKRCRVSDLEDLNKFLTKANEDQTSVKVKVVSAPTRTKKAMPKSVARAPKPLENTEA  
AQAQPSGSKFSPAIPVSTQESVSV**P**ASVSTSISISTGATASALVKGNTNPITSMSAPVQASAPAL  
TKSQTDRLEVLLNPKDEISLNSGKPFRELESELLSRRKKDLQQIYAEERENYLGKLEREITRFF  
VDRGFLEIKSPILIPLEYIERMGIDNDELTKQIFRVDKNFCLRPMLAPNLYNLRKLDRALPDP  
IKIFEIGPCYRKESDQKEHLEFTMLNFCQMGSGCTRENLESIITDFLNHLGIDFKIVGDSMV  
YGDTLDMHGDLELSSAVVGIPLDREWGIDKPWIGAGFGLERLLKVKHDFKNIKRAARSES  
YYNGISTNL

R61/H63/S193 are labeled in bold type; P149 and A150, the junction for insertion of linker, are labeled in red.

### *sfGFP:*

**M**XKGEELFTGVVPILVELDGDVNGHK**X**SVRGELEGDATNGKLT**L**KFICTTGKLPVPWPTLVT  
TLTYGVQCFSRYPDHMKRHDFFKSAMPEGYVQERTISFKDDGTYKTRAEVKFEGDTLVNRIE  
LKGIDFKEDGNILGHKLEYNFNSHNVYITADKQKNGIKANFKIRHNVEDGSVQLADHYQQNT  
PIGDGPVLLPDNHYLSTQSVLSKDPNEKRDMVLLFVTAAGITHGMDEL**Y**KGSELHHHHHH

**X** represents the positions for ncAA incorporation at S2 or F27 position with amber mutations.

## 2. Primers list

| Primers                | Primer sequence (5' to 3')                              |
|------------------------|---------------------------------------------------------|
| sfGFP-UAG2-NdeI-F      | GATATACATATGTAGAAGGGCGAAGAAGTGTACGGGCG                  |
| sfGFP-NdeI-F1          | GAGATATACATATGAGCAAGGGCGAAG                             |
| sfGFP-UAG27-F          | GGTCACAAATAGAGCGTGCGCGGCGAAGGTG                         |
| sfGFP-UAG27-R          | CACCTTCGCCGCGCACGCTCTATTTGTGACC                         |
| sfGFP-SacI-R2          | GATGGTGATGGAGCTCTGAGCCTTTATAC                           |
| PylRS-NcoI-F           | GTATTAACCATGGATAAAAAACCACTAAAC                          |
| PylRS-EcoRI-R          | GGCTTGCCGGAATTCAGGGAAATCTCATCTTTTG                      |
| PylRS-BamHI-R          | GGTCGACGGATCCTTACAGGTTGGTAGAAATCCCGTTATAG               |
| PylRS-EcoRI-F          | GATTTCCCTGAATTCCGGCAAGCCTTTCAGGGAGC                     |
| PylRS-R61K/H63Y-F      | GCAGGACTGCAAGAGCGCTCAAACACTATAAATACAGGAAG               |
| PylRS-R61K/H63Y-R      | TTTGCAGGTCTTCTGTATTTATAGTGTGTTGAGCGCTCTTG               |
| PylRS-R61K-F           | CAAGAGCGCTCAAACACCACAAATAC                              |
| PylRS-R61K-R           | GTATTTGTGGTGTGTTGAGCGCTCTTG                             |
| PylRS-H63Y-F           | GCTCAGGCACTATAAATACAGGAAG                               |
| PylRS-H63Y-R           | CTTCTGTATTTATAGTGCCTGAGC                                |
| PylRS-S193R-F          | CAGGCAAGTGCCCCCGCACTTACGAAGCGTCAGACTGACAG               |
| PylRS-S193R-R          | GACTTCAAGCCTGTCAGTCTGACGCTTCGTAAGTGCG                   |
| PylRS-P149SSS-R1       | GTTGAAACAGATGCCATCGCTTTTTTTCACGGGACAGAAAC               |
| PylRS-P149SSS-F2       | GTTTCTGTCCCGTGAAAAAAGCGATGGCATCTGTTTCAAC                |
| PylRS-P149-TAA-BamHI-R | GGTCGACGGATCCTTACGGGACAGAACTGACTC                       |
| Linker-1XG4S-F2        | GAGTGGTGGTGGTGGTAGCGCATCTGTTTCAACATCAATATC              |
| Linker-1XG4S-R1        | GCTACCACCACCACCCTCGGGACAGAACTGACTCTTGGGTG               |
| Linker-2XG4S-F2        | CAAGAGTCAGTTTCTGTCCCGAGTGGTGGTGGTGGTAGCGGAGG            |
| Linker-2XG4S-F3        | CAACATCAATATCAAGCATTCTACAGGAGCAAC                       |
| Linker-2XG4S-R1        | GACAGAACTGACTCTTGGGTGGAAACCGGTATC                       |
| Linker-2XG4S-R2        | CTTGATATTGATGTTGAAACAGATGCGCTTCCTCCCCCTCCGCTAC<br>CAC   |
| Linker-3XG4S-F2        | GTCAGTTTCTGTCCCGAGTGGTGGTGGTGGTAGCGGAGGGGGAGG<br>AAG    |
| Linker-3XG4S-F3        | CAACATCAATATCAAGCATTCTACAGGAGCAAC                       |
| Linker-3XG4S-R1        | GACAGAACTGACTCTTGGGTGGAAACCGGTATC                       |
| Linker-3XG4S-R2        | GATATTGATGTTGAAACAGATGCGCTTCCTCCCCCTCCGCTTCCTC<br>CCCCC |

### 3. Supplementary Figures

(A)

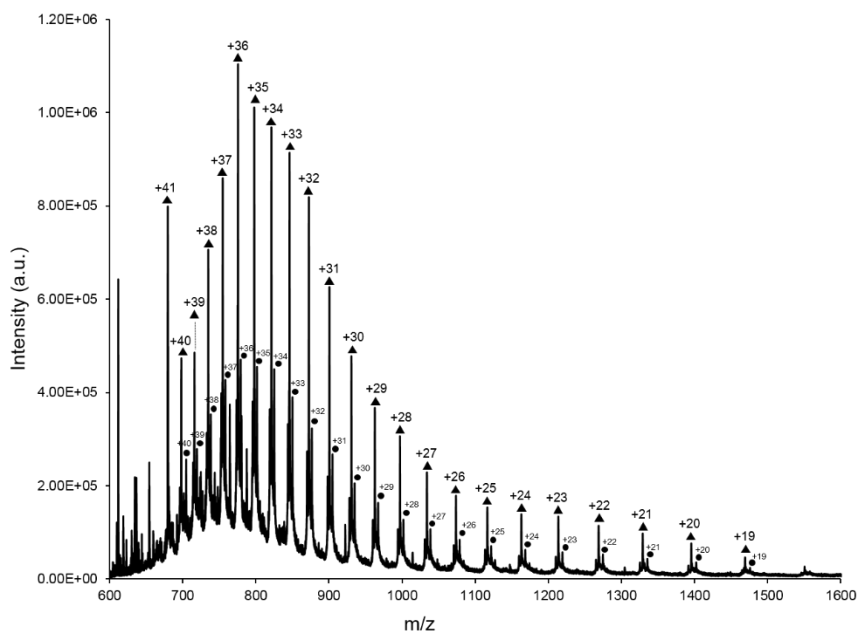

(B)

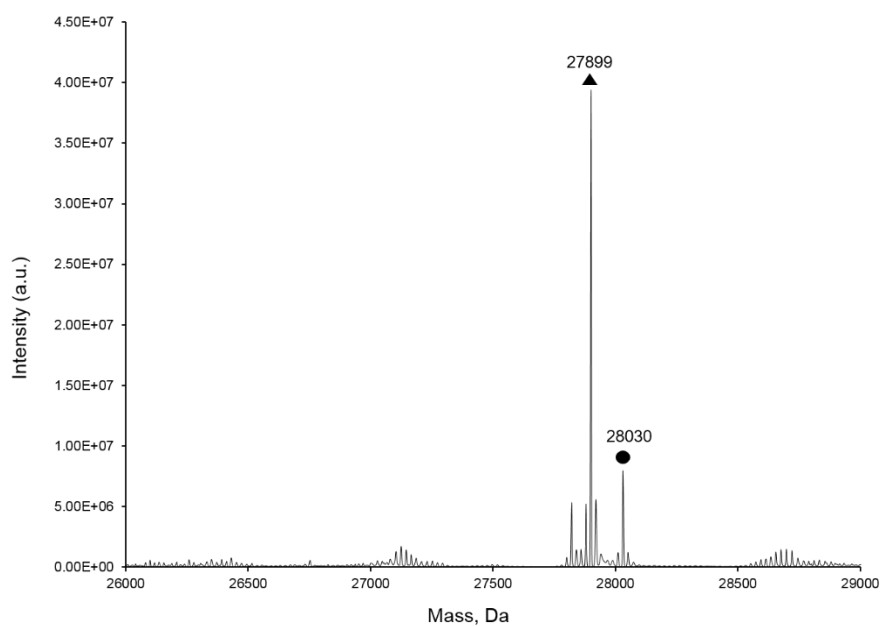**Figure S1. Molecular mass determination of sfGFP-3.**

Full-length sfGFP-UAG27-3 was expressed using N-PylRS•tRNA<sub>CUA</sub><sup>Pyl</sup> pair in *E. coli* BL21 (DE3) with the supplement of 2 mM **3** in GMLL medium. (A) ESI-MS spectrum of sfGFP-UAG27-3. (B) The deconvoluted ESI-MS spectrum of sfGFP-UAG27-3. The calculated molecular masses are 28,030 Da and 27,899 Da (–Met); observed molecular masses are 28,030 Da and 27,899 Da (–Met).

(A)

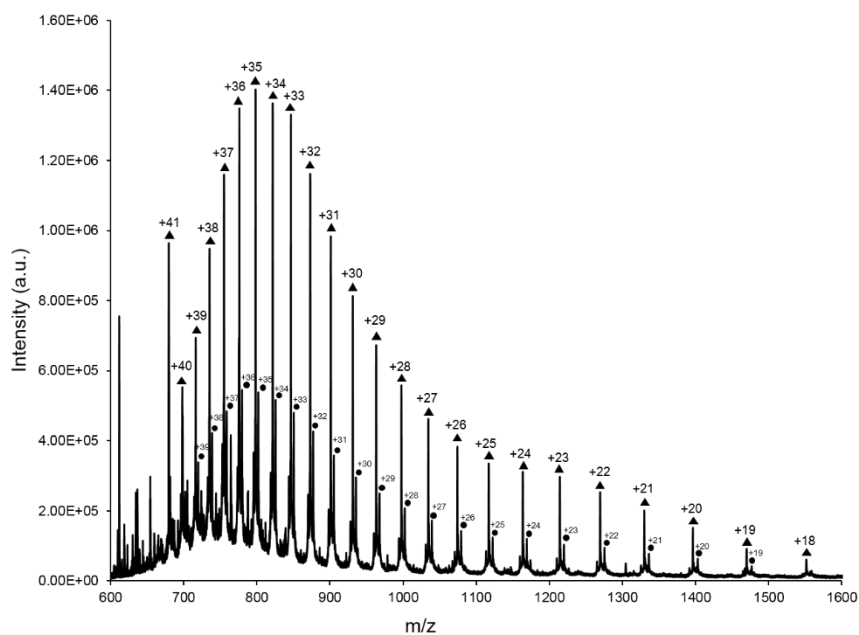

(B)

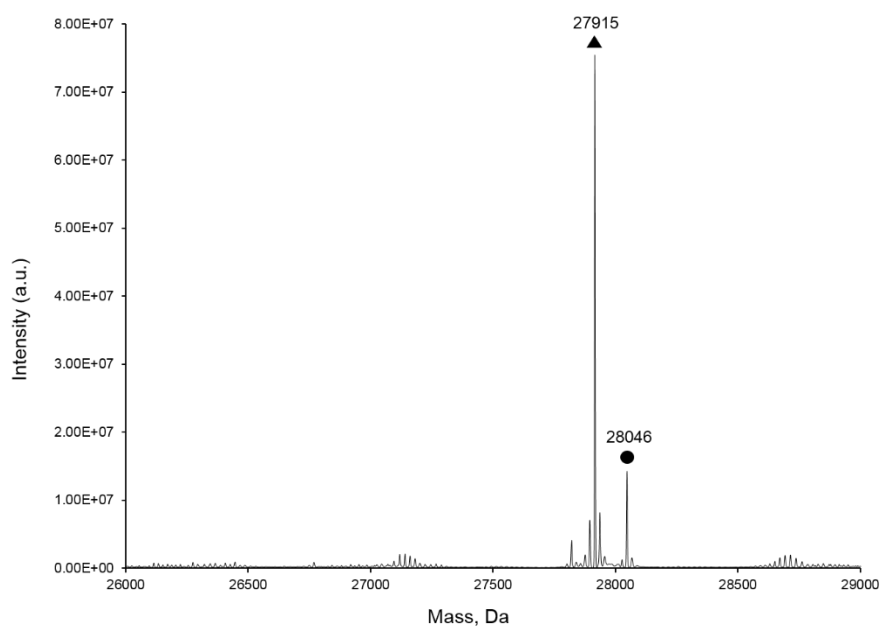**Figure S2. Molecular mass determination of sfGFP-4.**

Full-length sfGFP-UAG27-4 was expressed using N-PylRS•tRNA<sub>CUA</sub><sup>Pyl</sup> pair in *E. coli* BL21 (DE3) with the supplement of 2 mM **4** in GMLL medium. (A) ESI-MS spectrum of sfGFP-UAG27-4. (B) The deconvoluted ESI-MS spectrum of sfGFP-UAG27-4. The calculated molecular masses are 28,046 Da and 27,915 Da (–Met); observed molecular masses are 28,046 Da and 27,915 Da (–Met).

(A)

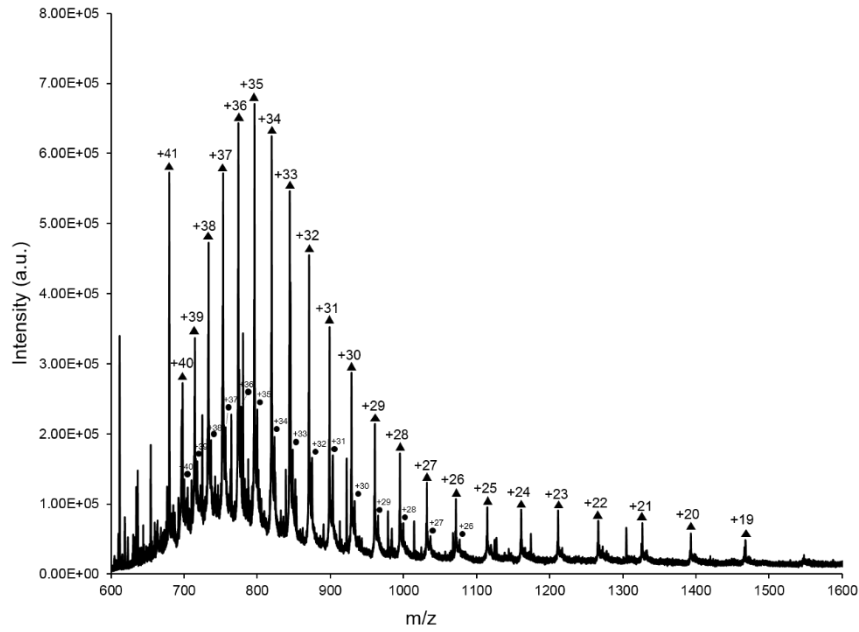

(B)

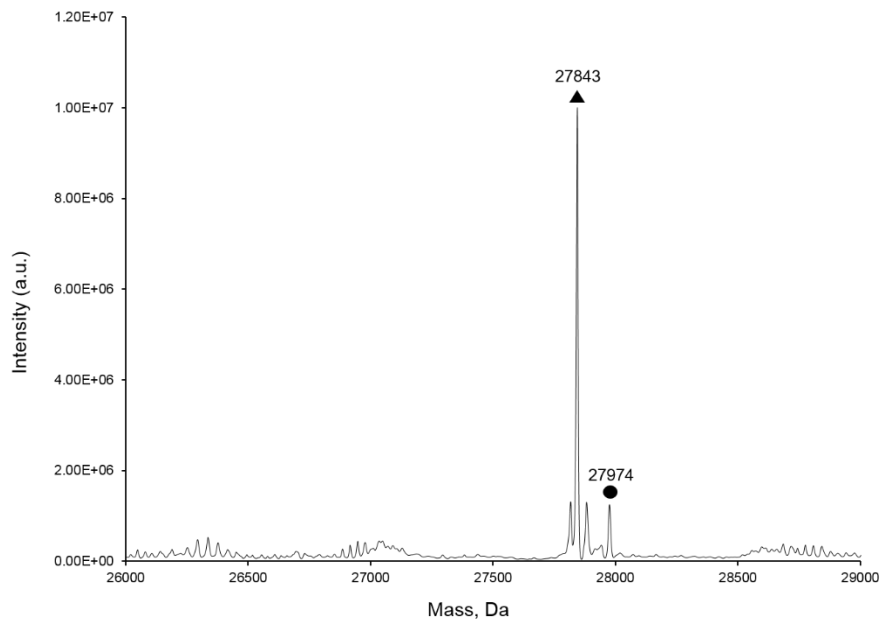

**Figure S3. Molecular mass determination of sfGFP-5.**

Full-length sfGFP-UAG27-5 was expressed using N-PylRS•tRNA<sup>Pyl</sup><sub>CUA</sub> pair in *E. coli* BL21 (DE3) with the supplement of 1 mM **5** in LB medium. (A) ESI-MS spectrum of sfGFP-UAG27-5. (B) The deconvoluted ESI-MS spectrum of sfGFP-UAG27-5. The calculated molecular masses are 27,974 Da and 27,843 Da (–Met); observed molecular masses are 27,974 Da and 27,843 Da (–Met).

(A)

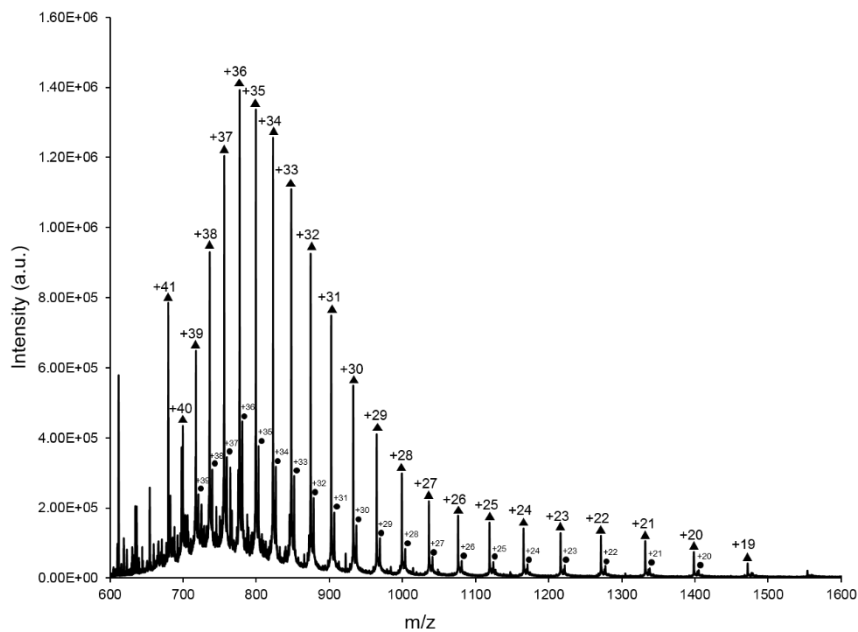

(B)

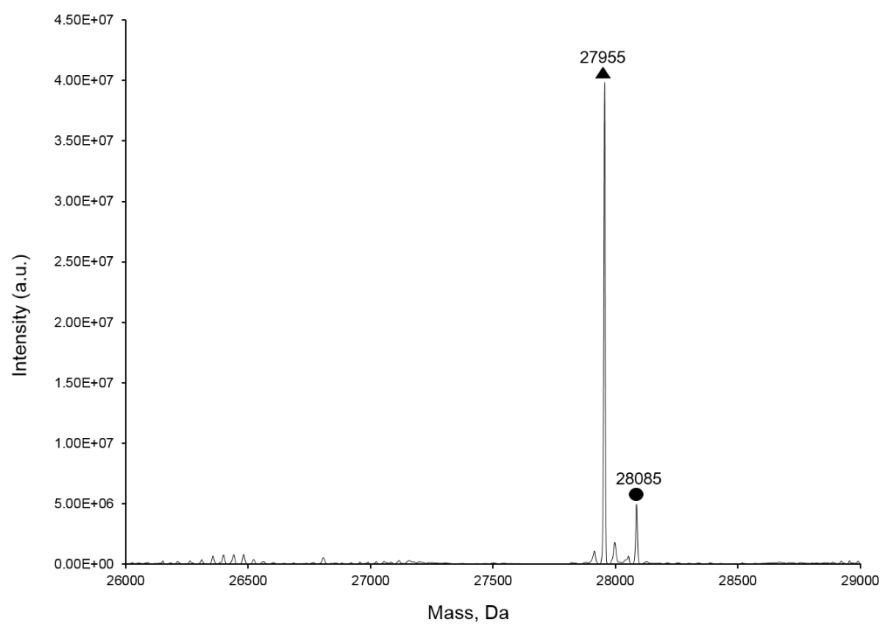

**Figure S4. Molecular mass determination of sfGFP-6.**

Full-length sfGFP-UAG27-6 was expressed using N-ZRS•tRNA<sub>CUA</sub><sup>Pyl</sup> pair in *E. coli* BL21 (DE3) with the supplement of 1 mM **6** in LB medium. (A) ESI-MS spectrum of sfGFP-UAG27-6. (B) The deconvoluted ESI-MS spectrum of sfGFP-UAG27-6. The calculated molecular masses are 28,085 Da and 27,954 Da (–Met); observed molecular masses are 28,085 Da and 27,955 Da (–Met).



(A)

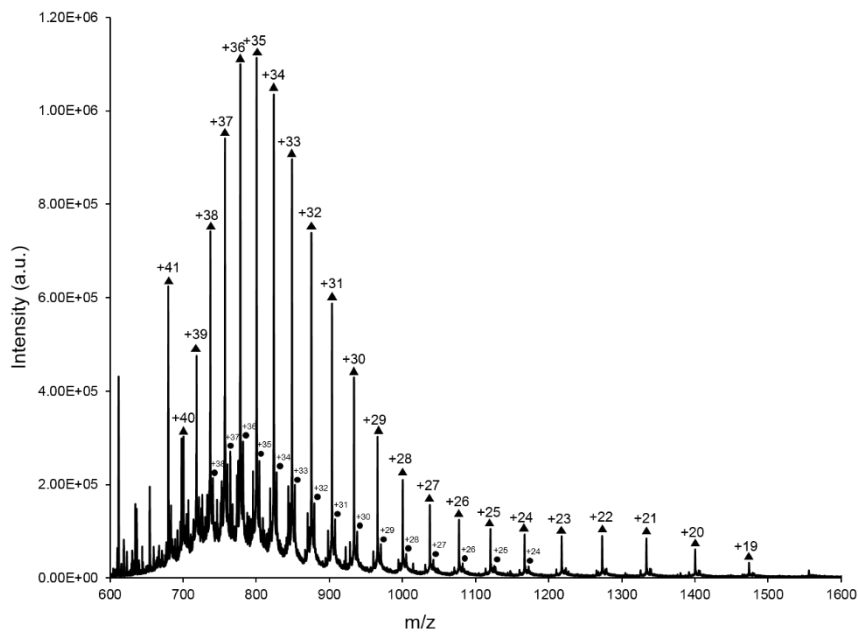

(B)

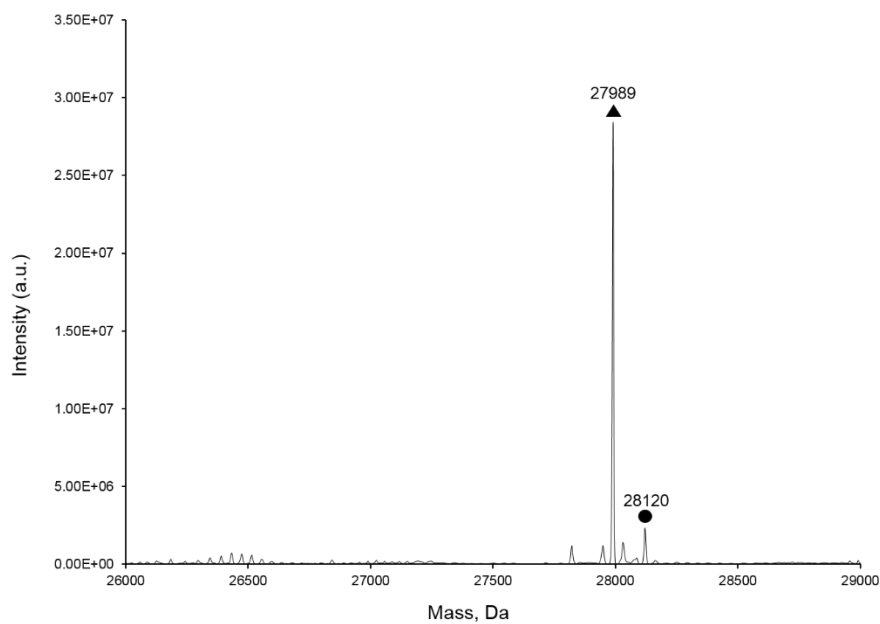**Figure S5. Molecular mass determination of sfGFP-7.**

Full-length sfGFP-UAG27-7 was expressed using N-ZRS•tRNA<sub>CUA</sub><sup>Pyl</sup> pair in *E. coli* BL21 (DE3) with the supplement of 1 mM **7** in LB medium. (A) ESI-MS spectrum of sfGFP-UAG27-7. (B) The deconvoluted ESI-MS spectrum of sfGFP-UAG27-7. The calculated molecular masses are 28,120 Da and 27,988 Da (–Met); observed molecular masses are 28,120 Da and 27,989 Da (–Met).

(A)

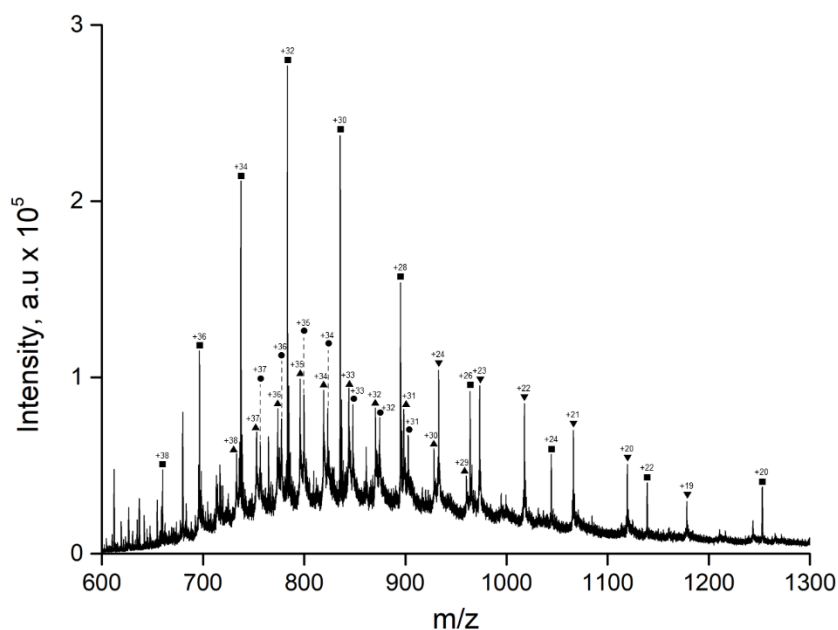

(B)

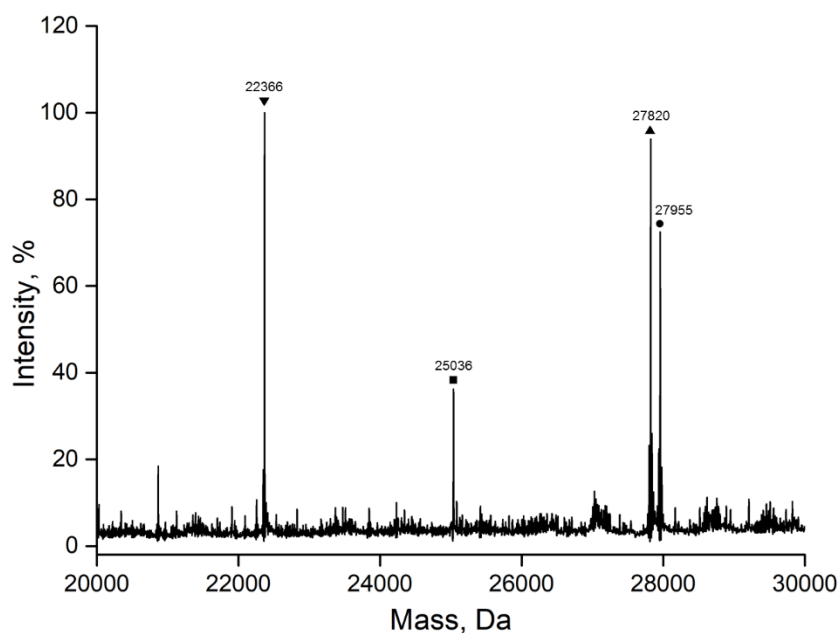

**Figure S6. Molecular mass determination of sfGFP-11.**

Full-length sfGFP-UAG27-**11** was expressed using N-ZRS•tRNA<sub>CUA</sub><sup>Pyl</sup> pair in *E. coli* BL21 (DE3) with the supplement of 1 mM **11** in GMML medium. (A) ESI-MS spectrum of sfGFP-UAG27-**11**. (B) The deconvoluted ESI-MS spectrum of sfGFP-UAG27-**11**. The calculated molecular masses of sfGFP-UAG27-**11** are 28,086 Da, 27,955 Da (–Met), 25,319 Da (truncated sfGFP at position 27), and 25,057 Da (truncated sfGFP at 27 position without N-terminal CbzKOH); observed molecular masses are 27,955 Da (–Met) and 27,820 Da (without Cbz group at position 27 and N-terminal Met residue), 25,036 Da, and 22,366 Da.

(A)

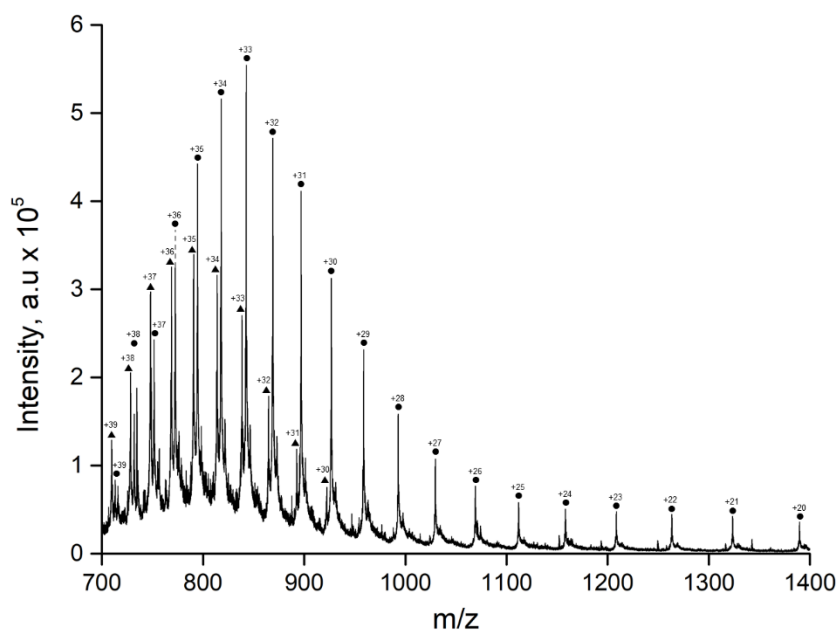

(B)

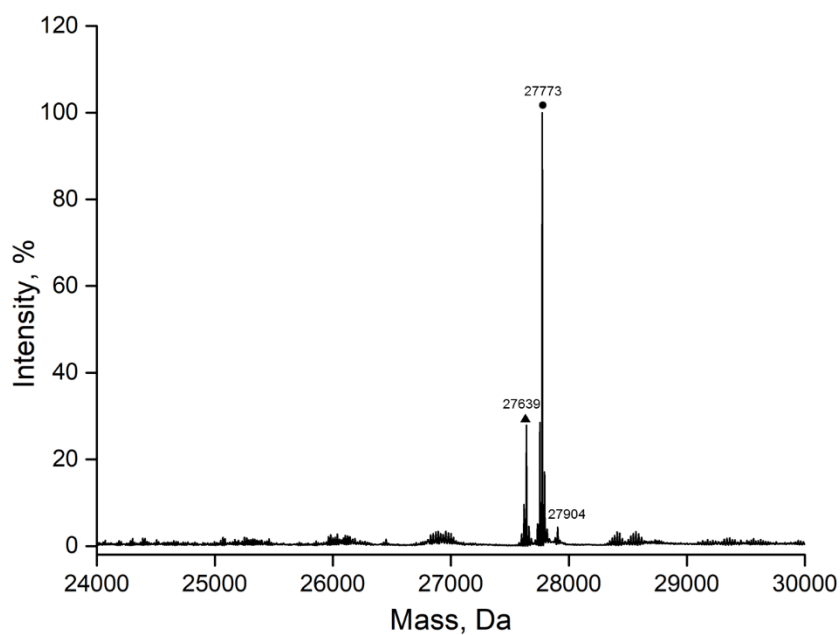

**Figure S7. Molecular mass determination of sfGFP-11\*.**

Full-length sfGFP-UAG2-11 was expressed using ZRS-D1•tRNA<sub>CUA</sub><sup>Pyl</sup> pair in *E. coli* BL21 (DE3) with the supplement of 1 mM 11 in GMML medium. (A) ESI-MS spectrum of sfGFP-UAG2-11. (B) The deconvoluted ESI-MS spectrum of sfGFP-UAG2-11. The calculated molecular masses of sfGFP-UAG2-11 are 27,904 Da, 27,773 Da (–Met), and 27,639 Da (without Cbz group at 2 position and N-terminal Met residue); observed molecular masses are 27,904 Da, 27,773 Da (–Met) and 27,639 Da.

(A)

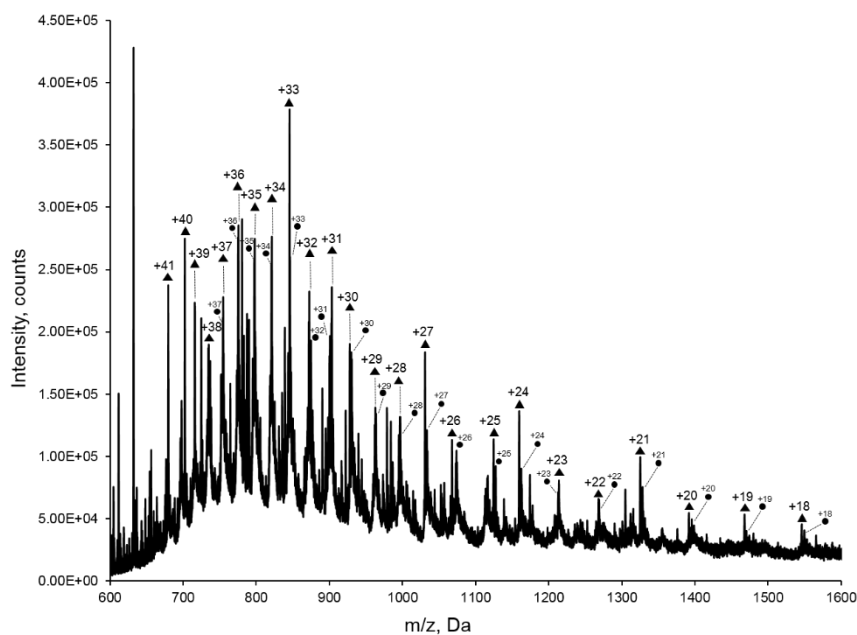

(B)

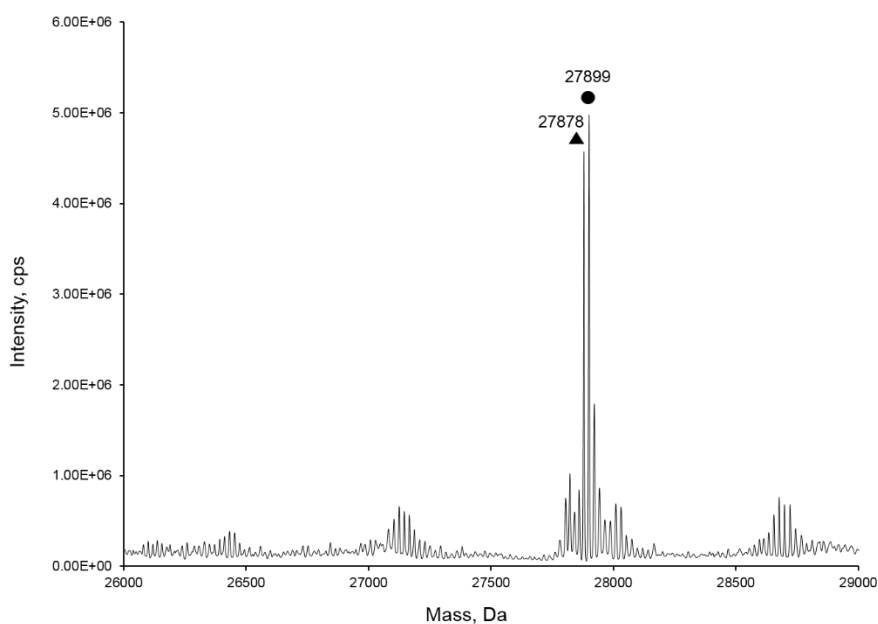**Figure S8. Molecular mass determination of sfGFP-3.**

Full-length sfGFP-UAG27-3 was expressed using N-ZRS•tRNA<sub>CUA</sub><sup>Pyl</sup> pair in *E. coli* BL21 (DE3) with the supplement of 2 mM **3** in GML medium. (A) ESI-MS spectrum of sfGFP-UAG27-3. (B) The deconvoluted ESI-MS spectrum of sfGFP-UAG27-3. The calculated molecular masses are 28,030 Da and 27,899 Da (–Met); observed molecular masses are 27,878 Da and 27,899 Da (–Met). The calculated molecular mass of sfGFP-F27W (–Met) is 27,878 Da.

(A)

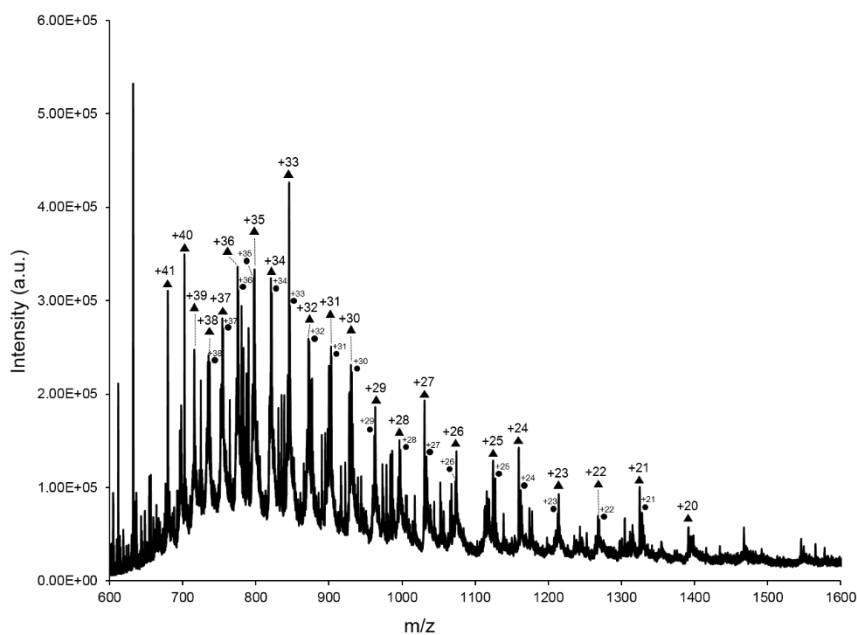

(B)

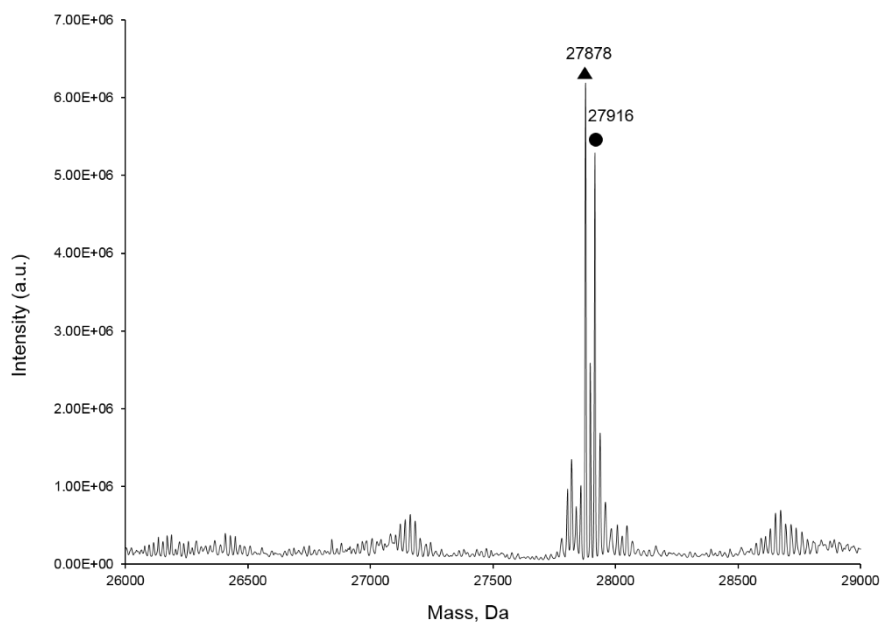

### Figure S9. Molecular mass determination of sfGFP-4.

Full-length sfGFP-UAG27-4 was expressed using N-ZRS•tRNA<sub>CUA</sub><sup>Pyl</sup> pair in *E. coli* BL21 (DE3) with the supplement of 2 mM **4** in GMML medium. (A) ESI-MS spectrum of sfGFP-UAG27-4. (B) The deconvoluted ESI-MS spectrum of sfGFP-UAG27-4. The calculated molecular masses are 28,046 Da and 27,915 Da (–Met); observed molecular masses are 27,878 Da and 27,916 Da (–Met). The calculated molecular mass of sfGFP-F27W (–Met) is 27,878 Da.

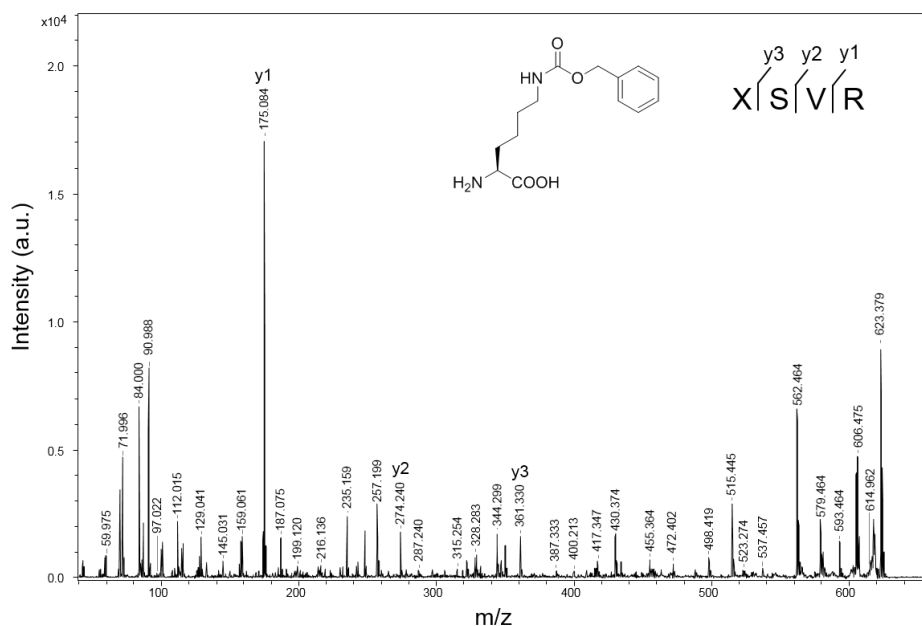

**Figure S10. MALDI-TOF-MS/MS analysis of sfGFP-6 at position 27.**

Full-length sfGFP-6 was expressed using N-ZRS in the presence of 1 mM **6** in LB medium. The MS/MS spectrum of the XSVR; X denotes nCAA **6** incorporated at position 27 fragment from sfGFP-6. The protein was in-gel digested by trypsin. The calculated molecular mass of X(**6**)SVR peptide fragment is 622.344 Da and found molecular mass is 623.379 Da.

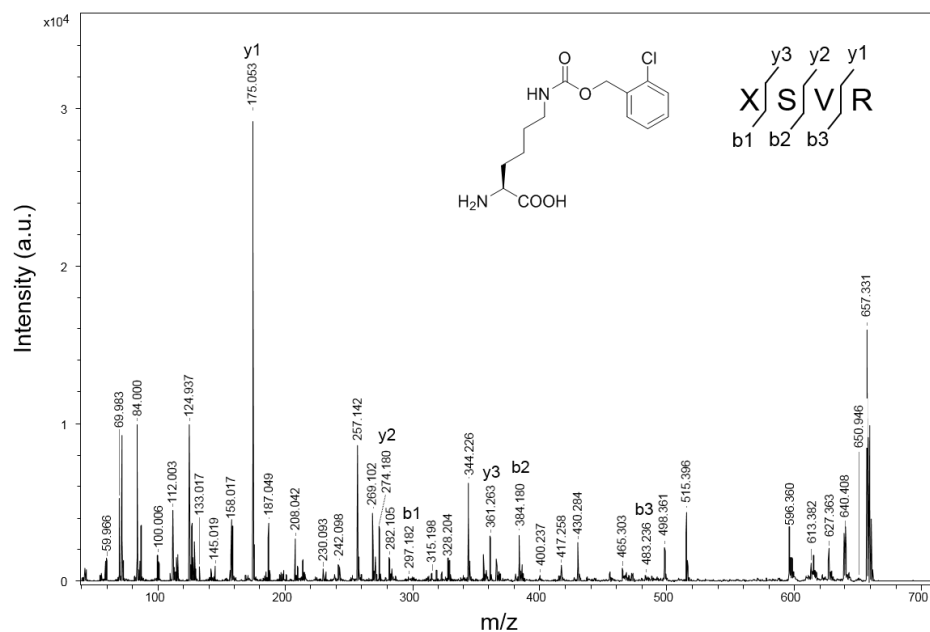

**Figure S11. MALDI-TOF-MS/MS analysis of sfGFP-7 at position 27.**

Full-length sfGFP-7 was expressed using N-ZRS in the presence of 1 mM **7** in LB medium. The MS/MS spectrum of the XSVR; X denotes nCAA **7** incorporated at position 27 fragment from sfGFP-7. The protein was in-gel digested by trypsin. The calculated molecular mass of X(**7**)SVR peptide fragment is 656.305 Da and found molecular mass is 657.331 Da.

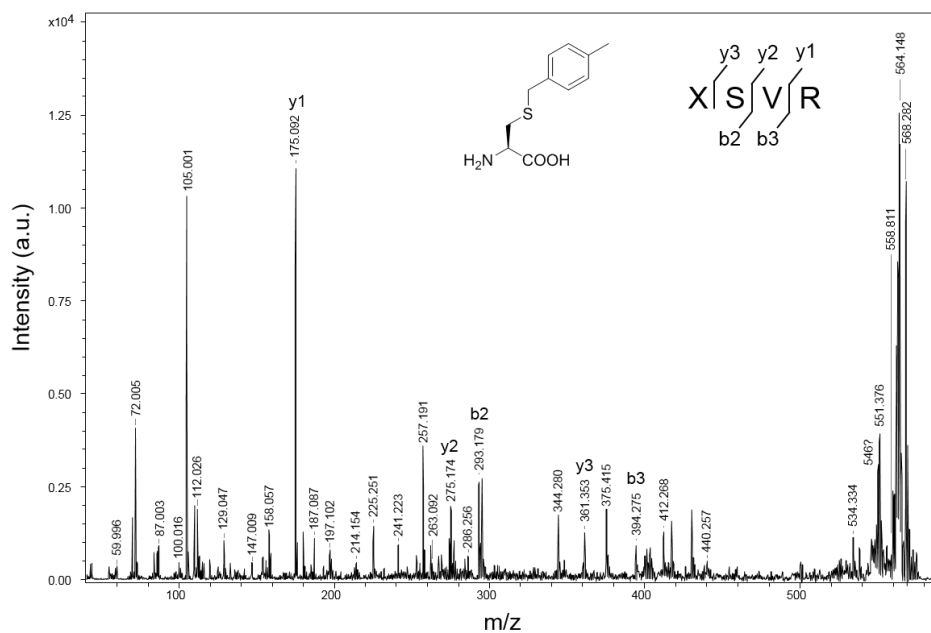

**Figure S12. MALDI-TOF-MS/MS analysis of sfGFP-3 at position 27.**

Full-length sfGFP-3 was expressed using N-ZRS in the presence of 2 mM **3** in GMML medium. The MS/MS spectrum of the XSVR; X denotes ncAA **3** incorporated at position 27 fragment from sfGFP-3. The protein was in-gel digested by trypsin. The calculated molecular mass of X(**3**)SVR peptide fragment is 567.284 Da and found molecular mass is 568.282 Da.

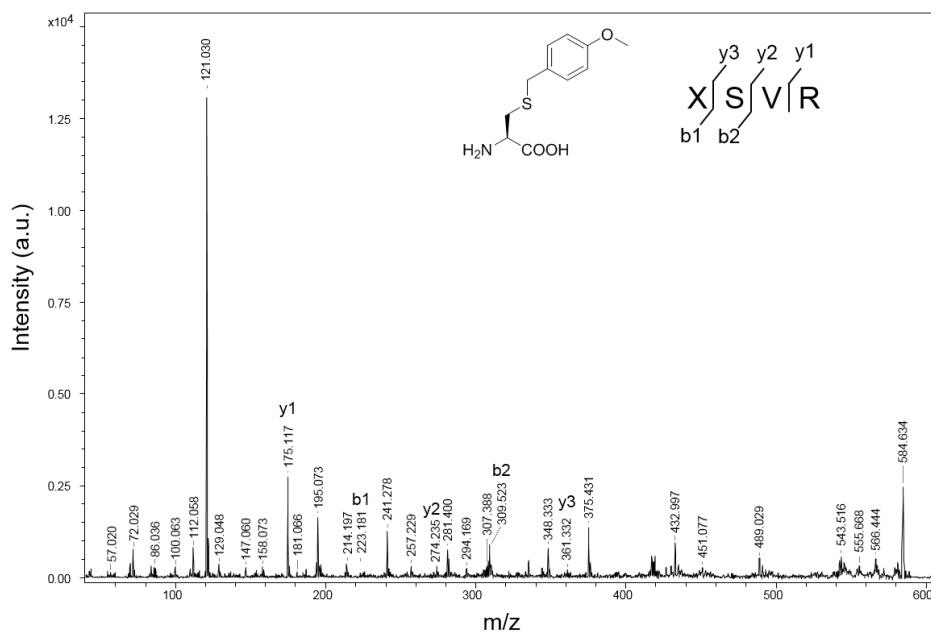

**Figure S13. MALDI-TOF-MS/MS analysis of sfGFP-4 at position 27.**

Full-length sfGFP-4 was expressed using N-ZRS in the presence of 2 mM **4** in GMML medium. The MS/MS spectrum of the XSVR; X denotes ncAA **4** incorporated at position 27 fragment from sfGFP-4. The protein was in-gel digested by trypsin. The calculated molecular mass of X(**4**)SVR peptide fragment is 583.279 Da and found molecular mass is 584.634 Da.

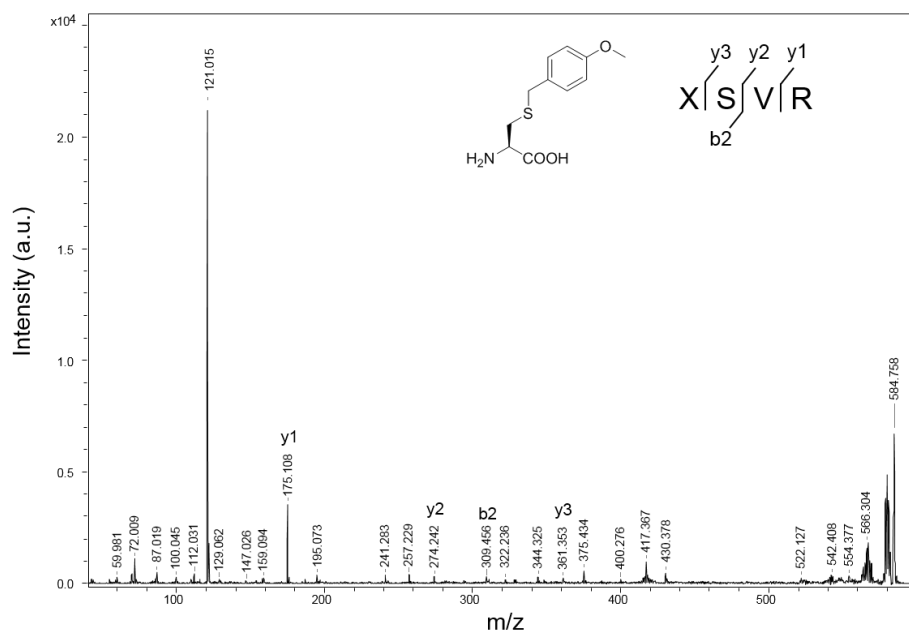

**Figure S14. MALDI-TOF-MS/MS analysis of sfGFP-4 at position 27.**

Full-length sfGFP-4 was expressed using N-PylRS in the presence of 2 mM **4** in GMML medium. The MS/MS spectrum of the XSVR; X denotes ncAA **4** incorporated at position 27 fragment from sfGFP-4. The protein was in-gel digested by trypsin. The calculated molecular mass of X(**4**)SVR peptide fragment is 583.279 Da and found molecular mass is 584.758 Da.



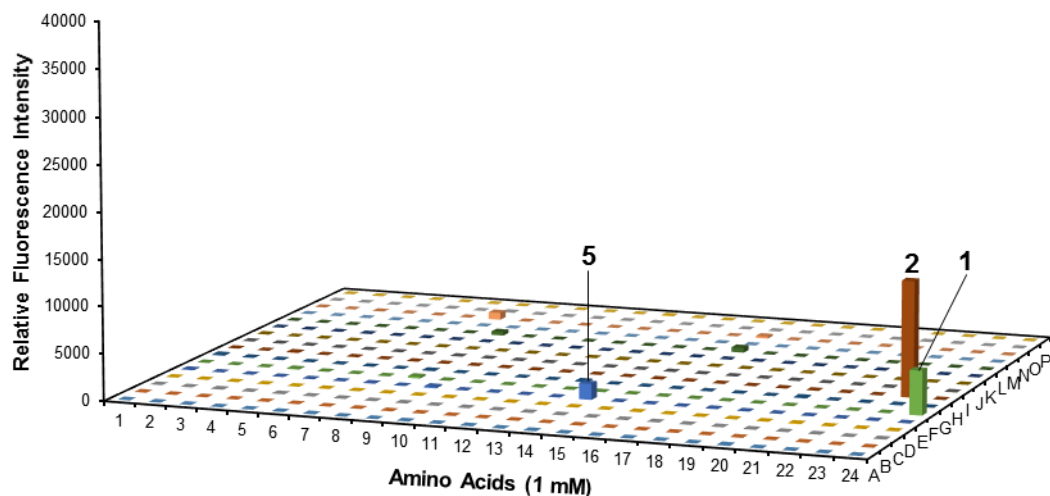

**Figure S15. Substrate range of wt-PylRS•tRNA<sup>Pyl</sup><sub>CUA</sub> pair in producing sfGFP-UAG27 proteins.** *sfGFP-UAG27* gene read-through in ncAAs library was measured by fluorescence intensity. Twelve wells (A1-2, B1-2, and C1-2: without ncAAs and IPTG; D1-2, E1-2, and F1-2: without ncAAs but containing IPTG) were used as controls to measure background signals. Substrate specificity profiles of wt-PylRS•tRNA<sup>Pyl</sup><sub>CUA</sub> pair were observed by *sfGFP-UAG27* gene suppression. The experiments were performed in the presence of 1 mM ncAAs and IPTG in GMML medium at 37°C for 12 h. *E. coli* BL21 (DE3) was used in the experiment.

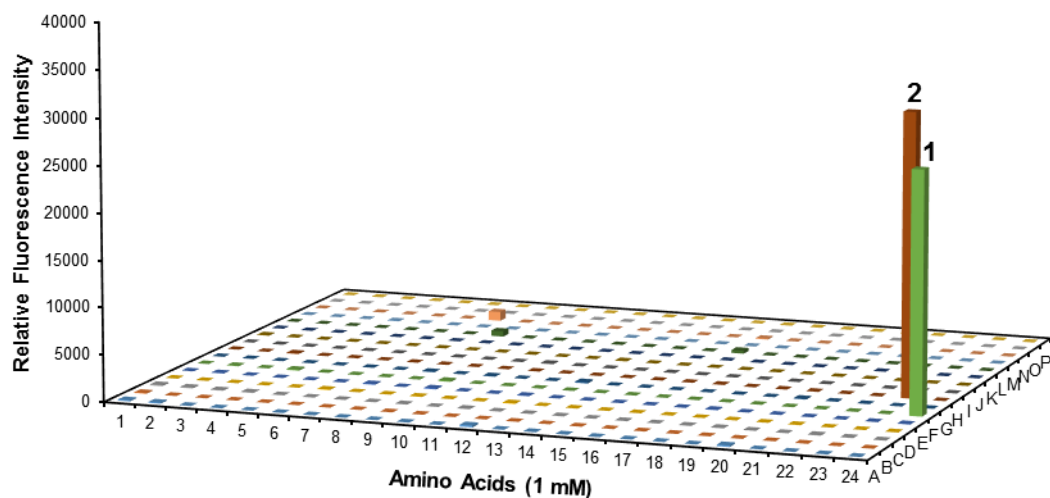

**Figure S16. Substrate range of wt-PylRS•tRNA<sup>Pyl</sup><sub>CUA</sub> pair in producing sfGFP-UAG2 proteins.** *sfGFP-UAG2* gene read-through in ncAAs library was measured by fluorescence intensity. Twelve wells (A1-2, B1-2, and C1-2: without ncAAs and IPTG; D1-2, E1-2, and F1-2: without ncAAs but containing IPTG) were used as controls to measure background signals. Substrate specificity profiles of wt-PylRS•tRNA<sup>Pyl</sup><sub>CUA</sub> pair were observed by *sfGFP-UAG2* gene suppression. The experiments were performed in the presence of 1 mM ncAAs and IPTG in GMML medium at 37°C for 12 h. *E. coli* BL21 (DE3) was used in the experiment.

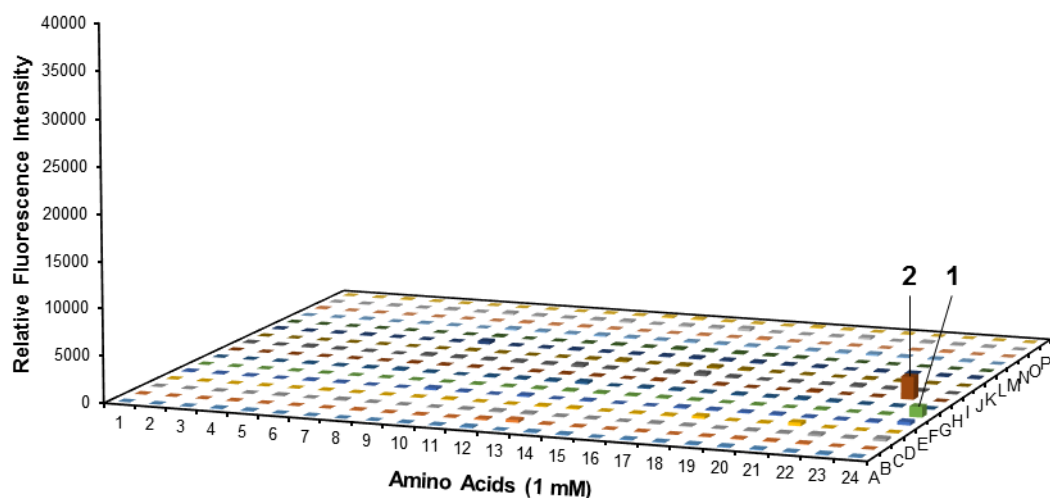

**Figure S17. Substrate range of PylRS-D1•tRNA<sub>CUA</sub><sup>Pyl</sup> pair in producing sfGFP-UAG27 proteins.** *sfGFP-UAG27* gene read-through in ncAAs library was measured by fluorescence intensity. Twelve wells (A1-2, B1-2, and C1-2: without ncAAs and IPTG; D1-2, E1-2, and F1-2: without ncAAs but containing IPTG) were used as controls to measure background signals. Substrate specificity profiles of PylRS-D1•tRNA<sub>CUA</sub><sup>Pyl</sup> pair were observed by *sfGFP-UAG27* gene suppression. The experiments were performed in the presence of 1 mM ncAAs and IPTG in GMML medium at 37°C for 12 h. *E. coli* BL21 (DE3) was used in the experiment.

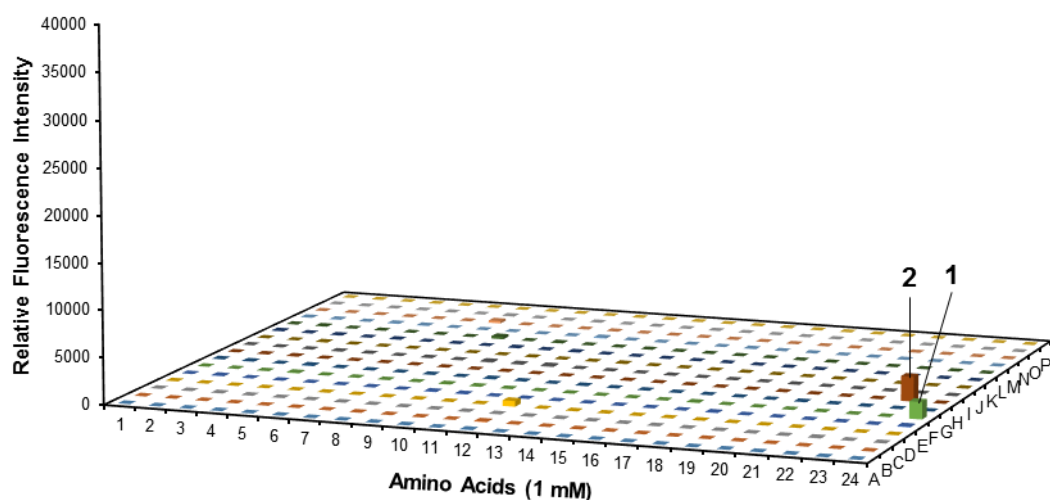

**Figure S18. Substrate range of PylRS-D1•tRNA<sub>CUA</sub><sup>Pyl</sup> pair in producing sfGFP-UAG2 proteins.** *sfGFP-UAG2* gene read-through in ncAAs library was measured by fluorescence intensity. Twelve wells (A1-2, B1-2, and C1-2: without ncAAs and IPTG; D1-2, E1-2, and F1-2: without ncAAs but containing IPTG) were used as controls to measure background signals. Substrate specificity profiles of PylRS-D1•tRNA<sub>CUA</sub><sup>Pyl</sup> pair were observed by *sfGFP-UAG2* gene suppression. The experiments were performed in the presence of 1 mM ncAAs and IPTG in GMML medium at 37°C for 12 h. *E. coli* BL21 (DE3) was used in the experiment.

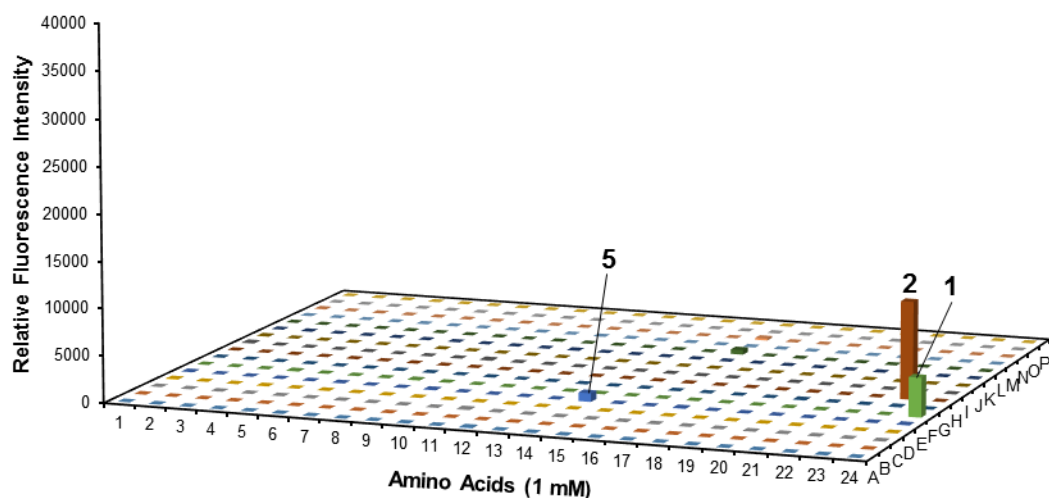

**Figure S19. Substrate range of PylRS-L1•tRNA<sup>Pyl</sup><sub>CUA</sub> pair in producing sfGFP-UAG27 proteins.** *sfGFP-UAG27* gene read-through in ncAAs library was measured by fluorescence intensity. Twelve wells (A1-2, B1-2, and C1-2: without ncAAs and IPTG; D1-2, E1-2, and F1-2: without ncAAs but containing IPTG) were used as controls to measure background signals. Substrate specificity profiles of PylRS-L1•tRNA<sup>Pyl</sup><sub>CUA</sub> pair were observed by *sfGFP-UAG27* gene suppression. The experiments were performed in the presence of 1 mM ncAAs and IPTG in GMML medium at 37°C for 12 h. *E. coli* BL21 (DE3) was used in the experiment.

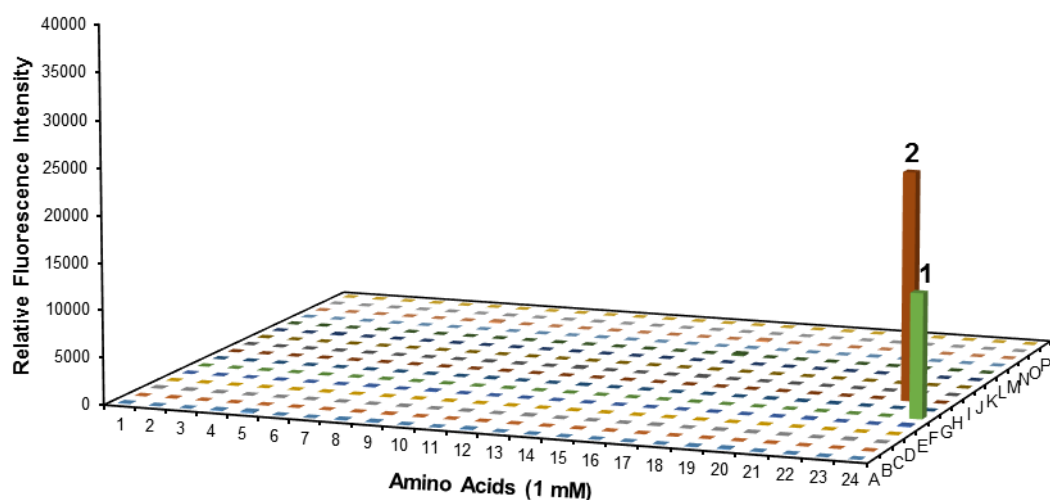

**Figure S20. Substrate range of PylRS-L1•tRNA<sup>Pyl</sup><sub>CUA</sub> pair in producing sfGFP-UAG2 proteins.** *sfGFP-UAG2* gene read-through in ncAAs library was measured by fluorescence intensity. Twelve wells (A1-2, B1-2, and C1-2: without ncAAs and IPTG; D1-2, E1-2, and F1-2: without ncAAs but containing IPTG) were used as controls to measure background signals. Substrate specificity profiles of PylRS-L1•tRNA<sup>Pyl</sup><sub>CUA</sub> pair were observed by *sfGFP-UAG2* gene suppression. The experiments were performed in the presence of 1 mM ncAAs and IPTG in GMML medium at 37°C for 12 h. *E. coli* BL21 (DE3) was used in the experiment.

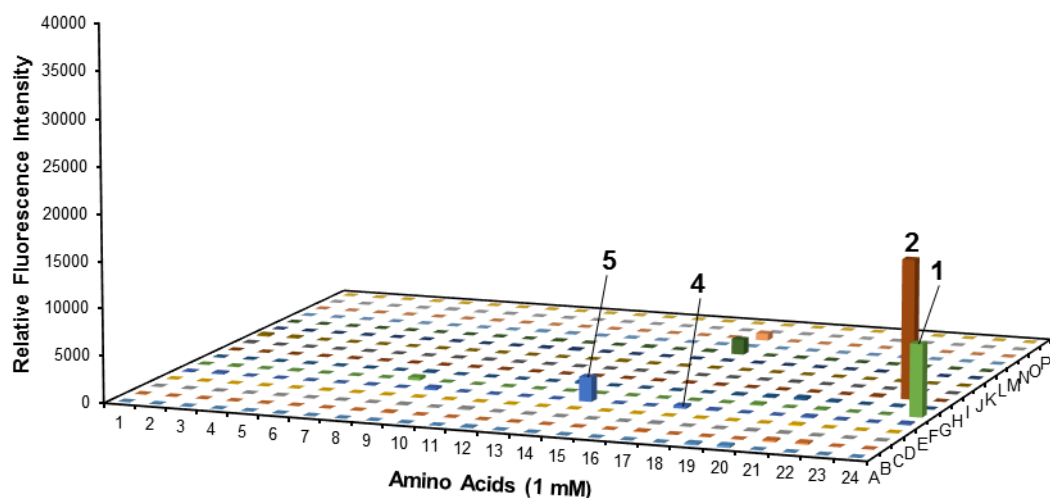

**Figure S21. Substrate range of PylRS-L2•tRNA<sub>CUA</sub><sup>Pyl</sup> pair in producing sfGFP-UAG27 proteins.** *sfGFP-UAG27* gene read-through in ncAAs library was measured by fluorescence intensity. Twelve wells (A1-2, B1-2, and C1-2: without ncAAs and IPTG; D1-2, E1-2, and F1-2: without ncAAs but containing IPTG) were used as controls to measure background signals. Substrate specificity profiles of PylRS-L2•tRNA<sub>CUA</sub><sup>Pyl</sup> pair were observed by *sfGFP-UAG27* gene suppression. The experiments were performed in the presence of 1 mM ncAAs and IPTG in GMML medium at 37°C for 12 h. *E. coli* BL21 (DE3) was used in the experiment.

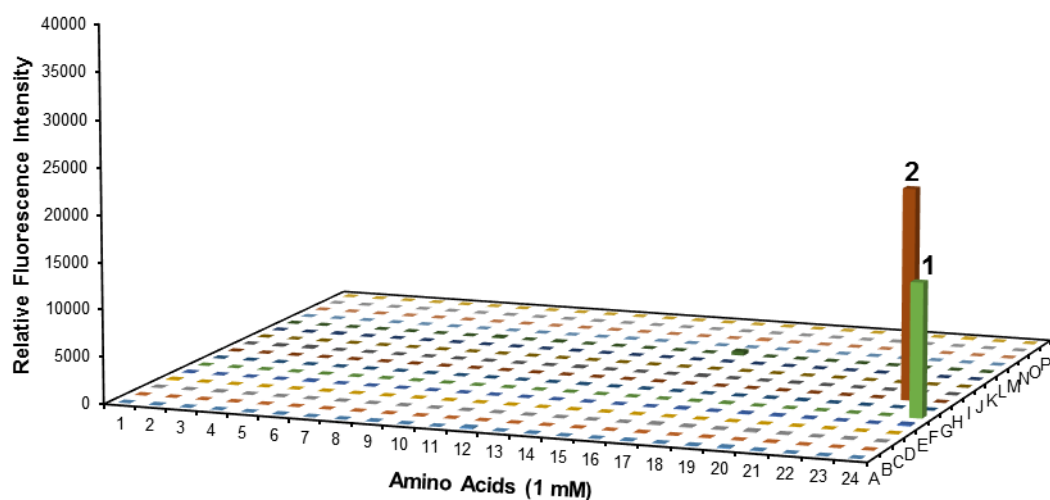

**Figure S22. Substrate range of PylRS-L2•tRNA<sub>CUA</sub><sup>Pyl</sup> pair in producing sfGFP-UAG2 proteins.** *sfGFP-UAG2* gene read-through in ncAAs library was measured by fluorescence intensity. Twelve wells (A1-2, B1-2, and C1-2: without ncAAs and IPTG; D1-2, E1-2, and F1-2: without ncAAs but containing IPTG) were used as controls to measure background signals. Substrate specificity profiles of PylRS-L2•tRNA<sub>CUA</sub><sup>Pyl</sup> pair were observed by *sfGFP-UAG2* gene suppression. The experiments were performed in the presence of 1 mM ncAAs and IPTG in GMML medium at 37°C for 12 h. *E. coli* BL21 (DE3) was used in the experiment.

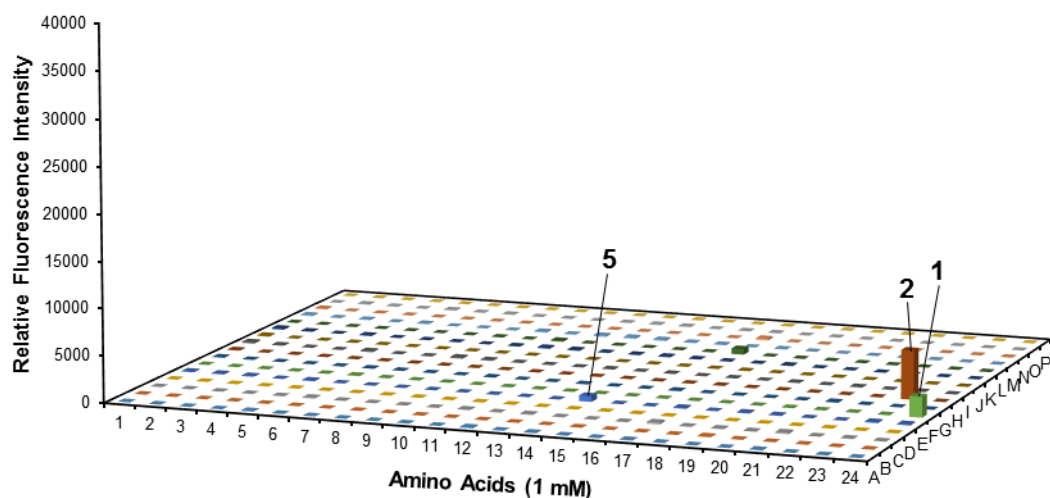

**Figure S23. Substrate range of PylRS-L3•tRNA<sup>Pyl</sup><sub>CUA</sub> pair in producing sfGFP-UAG27 proteins.** *sfGFP-UAG27* gene read-through in ncAAs library was measured by fluorescence intensity. Twelve wells (A1-2, B1-2, and C1-2: without ncAAs and IPTG; D1-2, E1-2, and F1-2: without ncAAs but containing IPTG) were used as controls to measure background signals. Substrate specificity profiles of PylRS-L3•tRNA<sup>Pyl</sup><sub>CUA</sub> pair were observed by *sfGFP-UAG27* gene suppression. The experiments were performed in the presence of 1 mM ncAAs and IPTG in GMML medium at 37°C for 12 h. *E. coli* BL21 (DE3) was used in the experiment.

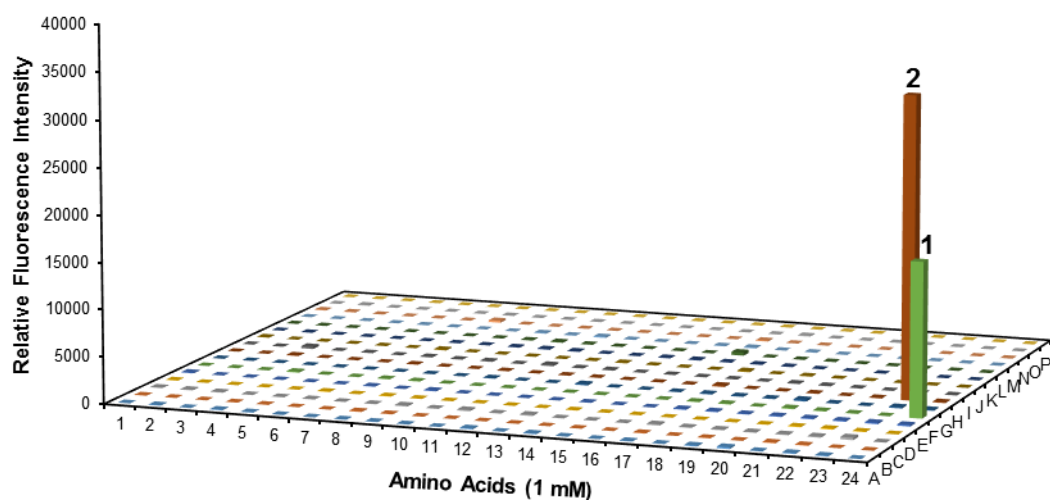

**Figure S24. Substrate range of PylRS-L3•tRNA<sup>Pyl</sup><sub>CUA</sub> pair in producing sfGFP-UAG2 proteins.** *sfGFP-UAG2* gene read-through in ncAAs library was measured by fluorescence intensity. Twelve wells (A1-2, B1-2, and C1-2: without ncAAs and IPTG; D1-2, E1-2, and F1-2: without ncAAs but containing IPTG) were used as controls to measure background signals. Substrate specificity profiles of PylRS-L3•tRNA<sup>Pyl</sup><sub>CUA</sub> pair were observed by *sfGFP-UAG2* gene suppression. The experiments were performed in the presence of 1 mM ncAAs and IPTG in GMML medium at 37°C for 12 h. *E. coli* BL21 (DE3) was used in the experiment.

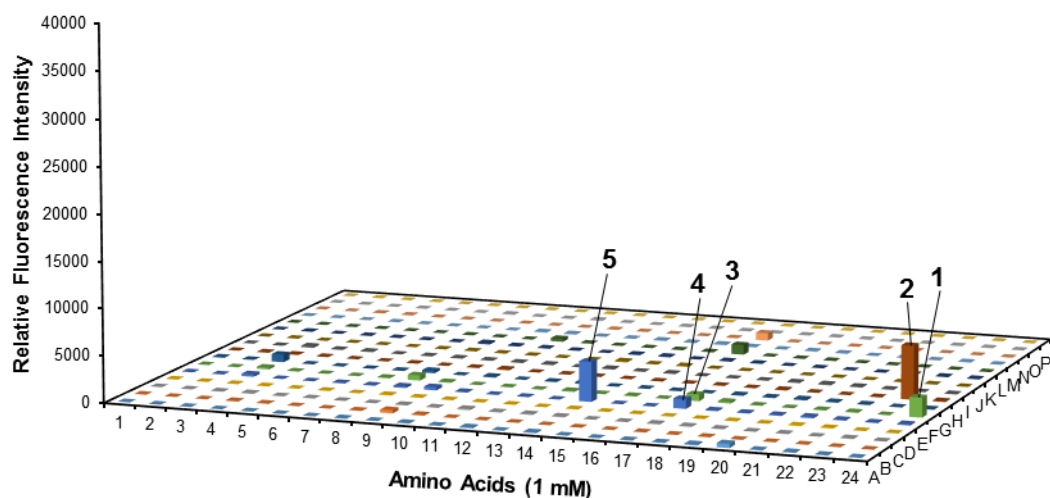

**Figure S25. Substrate range of N-PylRS•tRNA<sub>CUA</sub><sup>Pyl</sup> pair in producing sfGFP-UAG27 proteins.** *sfGFP-UAG27* gene read-through in ncAAs library was measured by fluorescence intensity. Twelve wells (A1-2, B1-2, and C1-2: without ncAAs and IPTG; D1-2, E1-2, and F1-2: without ncAAs but containing IPTG) were used as controls to measure background signals. Substrate specificity profiles of N-PylRS•tRNA<sub>CUA</sub><sup>Pyl</sup> pair were observed by *sfGFP-UAG27* gene suppression. The experiments were performed in the presence of 1 mM ncAAs and IPTG in GMML medium at 37°C for 12 h. *E. coli* BL21 (DE3) was used in the experiment.

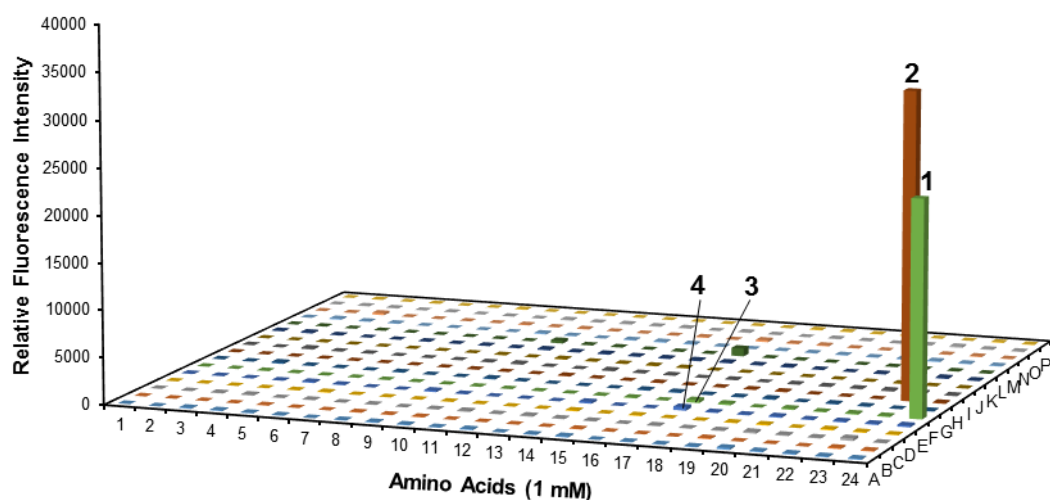

**Figure S26. Substrate range of N-PylRS•tRNA<sub>CUA</sub><sup>Pyl</sup> pair in producing sfGFP-UAG2 proteins.** *sfGFP-UAG2* gene read-through in ncAAs library was measured by fluorescence intensity. Twelve wells (A1-2, B1-2, and C1-2: without ncAAs and IPTG; D1-2, E1-2, and F1-2: without ncAAs but containing IPTG) were used as controls to measure background signals. Substrate specificity profiles of N-PylRS•tRNA<sub>CUA</sub><sup>Pyl</sup> pair were observed by *sfGFP-UAG2* gene suppression. The experiments were performed in the presence of 1 mM ncAAs and IPTG in GMML medium at 37°C for 12 h. *E. coli* BL21 (DE3) was used in the experiment.

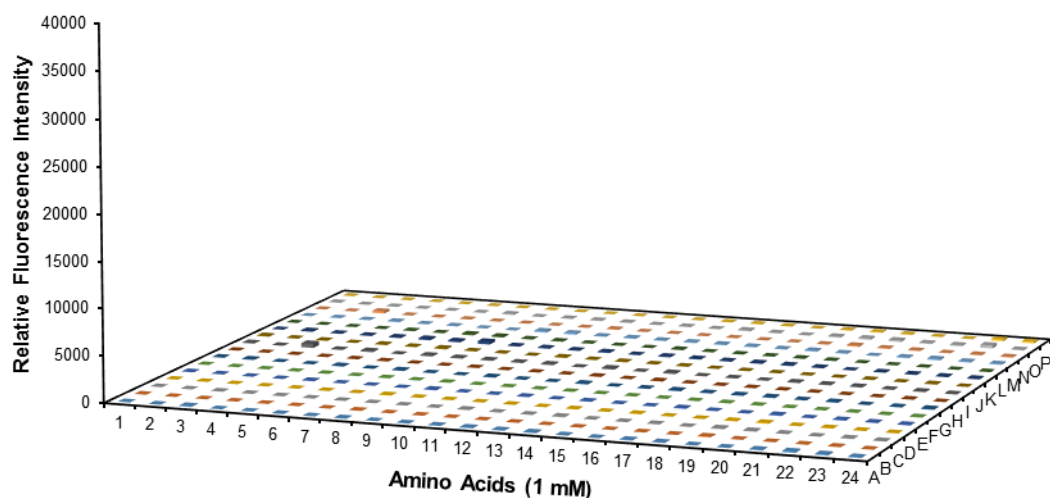

**Figure S27. Substrate range of N-PylRS-D1•tRNA<sub>CUA</sub><sup>Pyl</sup> pair in producing sfGFP-UAG27 proteins.** *sfGFP-UAG27* gene read-through in ncAAs library was measured by fluorescence intensity. Twelve wells (A1-2, B1-2, and C1-2: without ncAAs and IPTG; D1-2, E1-2, and F1-2: without ncAAs but containing IPTG) were used as controls to measure background signals. Substrate specificity profiles of N-PylRS-D1•tRNA<sub>CUA</sub><sup>Pyl</sup> pair were observed by *sfGFP-UAG27* gene suppression. The experiments were performed in the presence of 1 mM ncAAs and IPTG in GMML medium at 37°C for 12 h. *E. coli* BL21 (DE3) was used in the experiment.

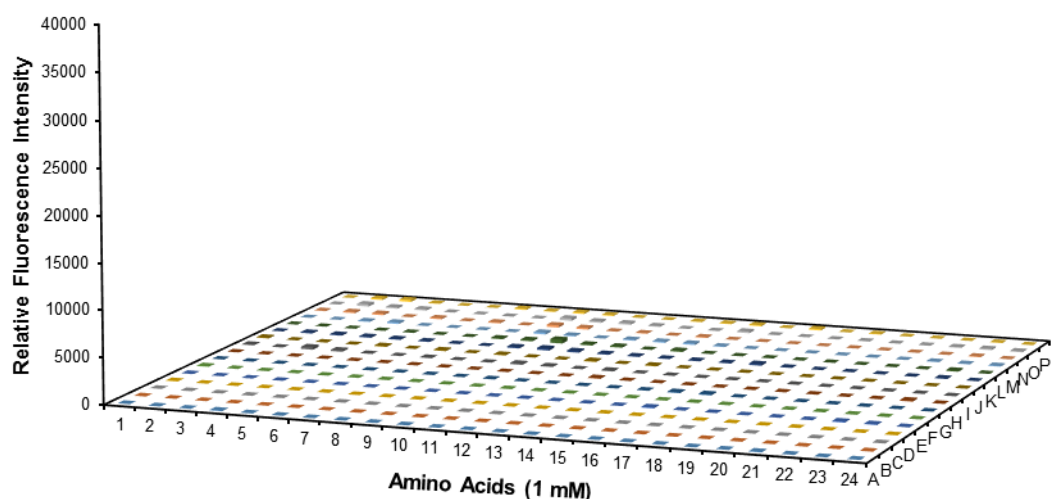

**Figure S28. Substrate range of N-PylRS-D1•tRNA<sub>CUA</sub><sup>Pyl</sup> pair in producing sfGFP-UAG2 proteins.** *sfGFP-UAG2* gene read-through in ncAAs library was measured by fluorescence intensity. Twelve wells (A1-2, B1-2, and C1-2: without ncAAs and IPTG; D1-2, E1-2, and F1-2: without ncAAs but containing IPTG) were used as controls to measure background signals. Substrate specificity profiles of N-PylRS-D1•tRNA<sub>CUA</sub><sup>Pyl</sup> pair were observed by *sfGFP-UAG2* gene suppression. The experiments were performed in the presence of 1 mM ncAAs and IPTG in GMML medium at 37°C for 12 h. *E. coli* BL21 (DE3) was used in the experiment.

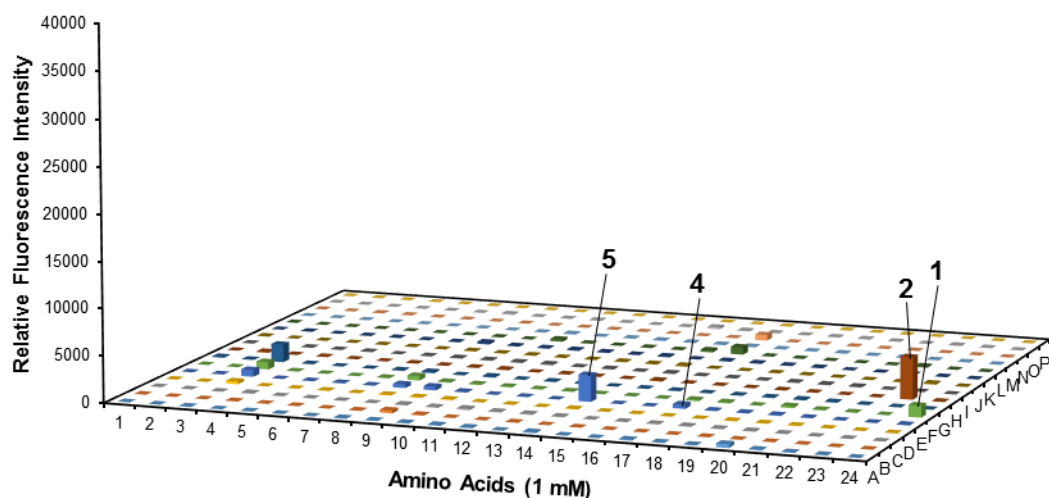

**Figure S29. Substrate range of N-PylRS-L1•tRNA<sub>CUA</sub><sup>Pyl</sup> pair in producing sfGFP-UAG27 proteins.** *sfGFP-UAG27* gene read-through in ncAAs library was measured by fluorescence intensity. Twelve wells (A1-2, B1-2, and C1-2: without ncAAs and IPTG; D1-2, E1-2, and F1-2: without ncAAs but containing IPTG) were used as controls to measure background signals. Substrate specificity profiles of N-PylRS-L1•tRNA<sub>CUA</sub><sup>Pyl</sup> pair were observed by *sfGFP-UAG27* gene suppression. The experiments were performed in the presence of 1 mM ncAAs and IPTG in GMML medium at 37°C for 12 h. *E. coli* BL21 (DE3) was used in the experiment.

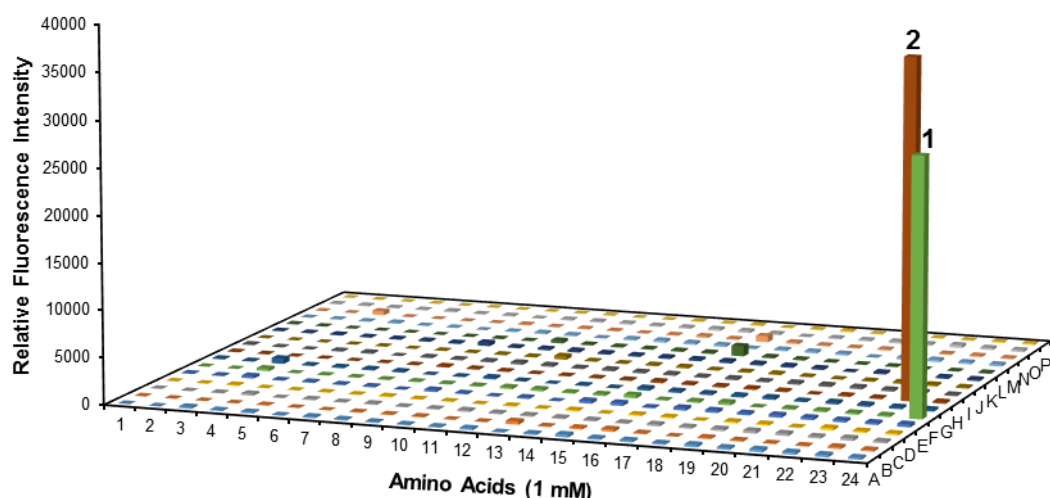

**Figure S30. Substrate range of N-PylRS-L1•tRNA<sub>CUA</sub><sup>Pyl</sup> pair in producing sfGFP-UAG2 proteins.** *sfGFP-UAG2* gene read-through in ncAAs library was measured by fluorescence intensity. Twelve wells (A1-2, B1-2, and C1-2: without ncAAs and IPTG; D1-2, E1-2, and F1-2: without ncAAs but containing IPTG) were used as controls to measure background signals. Substrate specificity profiles of N-PylRS-L1•tRNA<sub>CUA</sub><sup>Pyl</sup> pair were observed by *sfGFP-UAG2* gene suppression. The experiments were performed in the presence of 1 mM ncAAs and IPTG in GMML medium at 37°C for 12 h. *E. coli* BL21 (DE3) was used in the experiment.



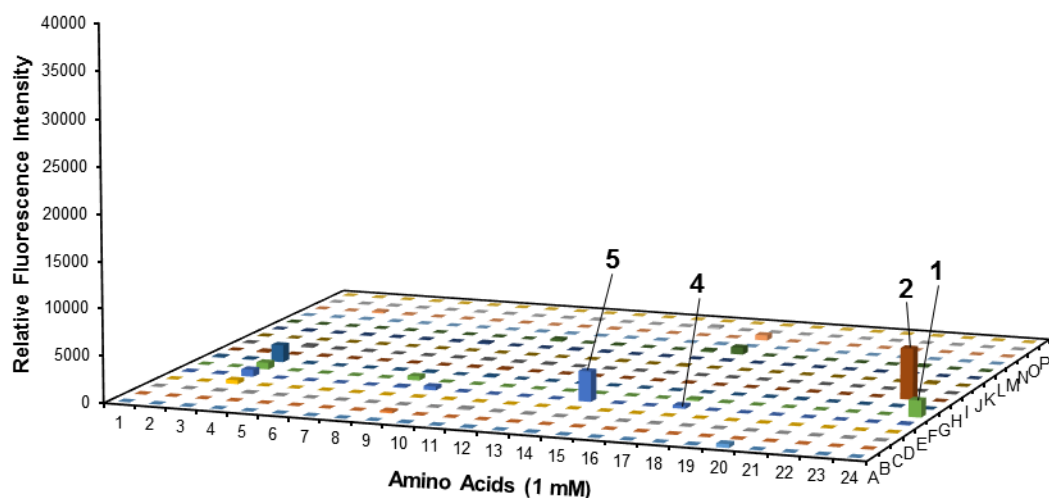

**Figure S31. Substrate range of N-PylRS-L2•tRNA<sup>Pyl</sup><sub>CUA</sub> pair in producing sfGFP-UAG27 proteins.** *sfGFP-UAG27* gene read-through in ncAAs library was measured by fluorescence intensity. Twelve wells (A1-2, B1-2, and C1-2: without ncAAs and IPTG; D1-2, E1-2, and F1-2: without ncAAs but containing IPTG) were used as controls to measure background signals. Substrate specificity profiles of N-PylRS-L2•tRNA<sup>Pyl</sup><sub>CUA</sub> pair were observed by *sfGFP-UAG27* gene suppression. The experiments were performed in the presence of 1 mM ncAAs and IPTG in GMML medium at 37°C for 12 h. *E. coli* BL21 (DE3) was used in the experiment.

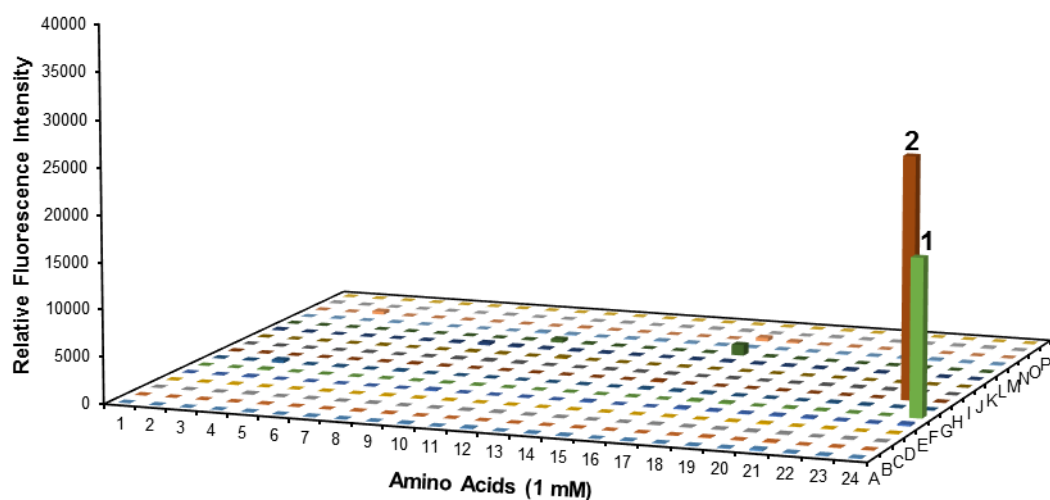

**Figure S32. Substrate range of N-PylRS-L2•tRNA<sup>Pyl</sup><sub>CUA</sub> pair in producing sfGFP-UAG2 proteins.** *sfGFP-UAG2* gene read-through in ncAAs library was measured by fluorescence intensity. Twelve wells (A1-2, B1-2, and C1-2: without ncAAs and IPTG; D1-2, E1-2, and F1-2: without ncAAs but containing IPTG) were used as controls to measure background signals. Substrate specificity profiles of N-PylRS-L2•tRNA<sup>Pyl</sup><sub>CUA</sub> pair were observed by *sfGFP-UAG2* gene suppression. The experiments were performed in the presence of 1 mM ncAAs and IPTG in GMML medium at 37°C for 12 h. *E. coli* BL21 (DE3) was used in the experiment.

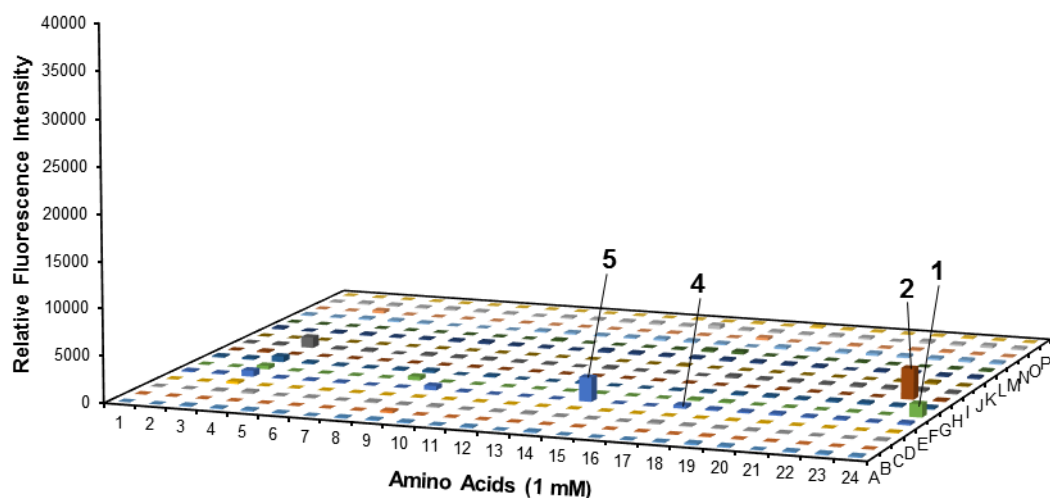

**Figure S33. Substrate range of N-PylRS-L3•tRNA<sub>CUA</sub><sup>Pyl</sup> pair in producing sfGFP-UAG27 proteins.** *sfGFP-UAG27* gene read-through in ncAAs library was measured by fluorescence intensity. Twelve wells (A1-2, B1-2, and C1-2: without ncAAs and IPTG; D1-2, E1-2, and F1-2: without ncAAs but containing IPTG) were used as controls to measure background signals. Substrate specificity profiles of N-PylRS-L3•tRNA<sub>CUA</sub><sup>Pyl</sup> pair were observed by *sfGFP-UAG27* gene suppression. The experiments were performed in the presence of 1 mM ncAAs and IPTG in GMML medium at 37°C for 12 h. *E. coli* BL21 (DE3) was used in the experiment.

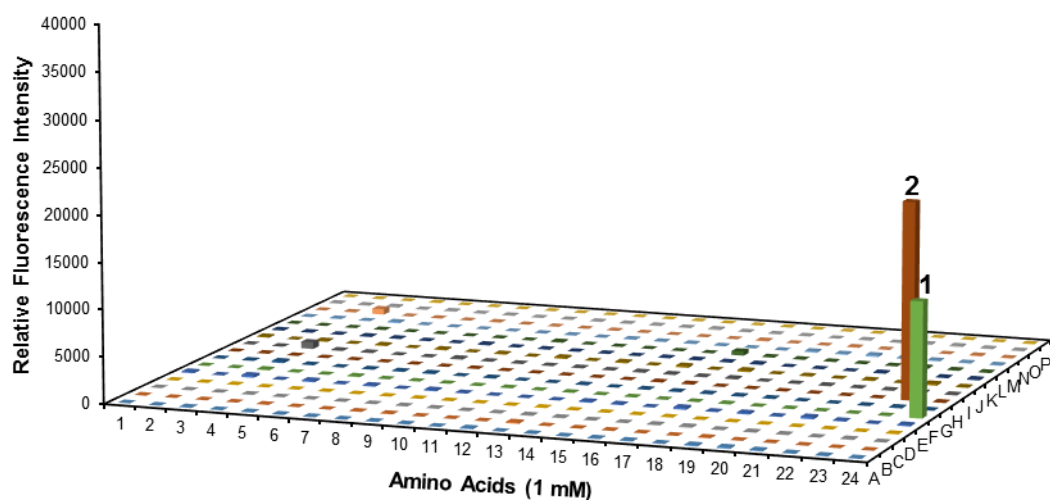

**Figure S34. Substrate range of N-PylRS-L3•tRNA<sub>CUA</sub><sup>Pyl</sup> pair in producing sfGFP-UAG2 proteins.** *sfGFP-UAG2* gene read-through in ncAAs library was measured by fluorescence intensity. Twelve wells (A1-2, B1-2, and C1-2: without ncAAs and IPTG; D1-2, E1-2, and F1-2: without ncAAs but containing IPTG) were used as controls to measure background signals. Substrate specificity profiles of N-PylRS-L3•tRNA<sub>CUA</sub><sup>Pyl</sup> pair were observed by *sfGFP-UAG2* gene suppression. The experiments were performed in the presence of 1 mM ncAAs and IPTG in GMML medium at 37°C for 12 h. *E. coli* BL21 (DE3) was used in the experiment.

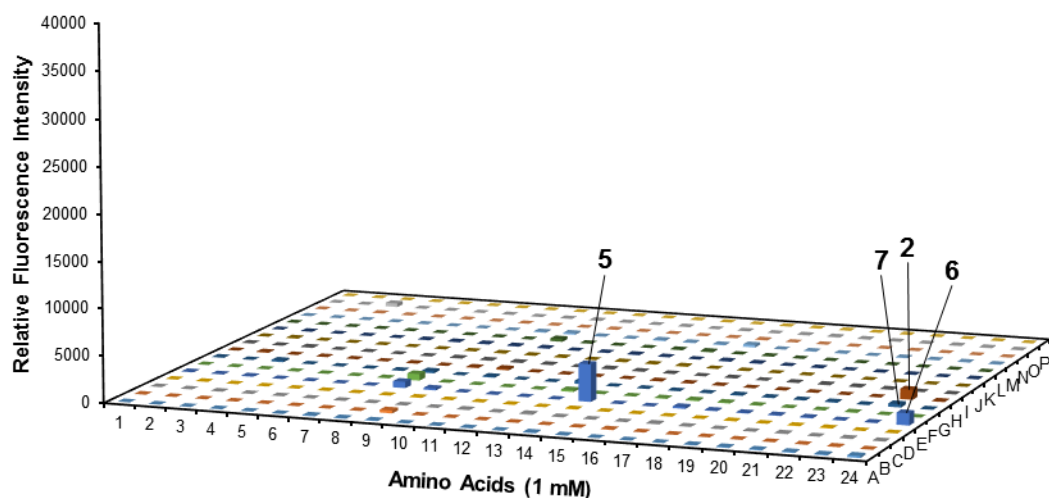

**Figure S35. Substrate range of N-ZRS•tRNA<sup>Pyl</sup><sub>CUA</sub> pair in producing sfGFP-UAG27 proteins.** *sfGFP-UAG27* gene read-through in ncAAs library was measured by fluorescence intensity. Twelve wells (A1-2, B1-2, and C1-2: without ncAAs and IPTG; D1-2, E1-2, and F1-2: without ncAAs but containing IPTG) were used as controls to measure background signals. Substrate specificity profiles of N-ZRS•tRNA<sup>Pyl</sup><sub>CUA</sub> pair were observed by *sfGFP-UAG27* gene suppression. The experiments were performed in the presence of 1 mM ncAAs and IPTG in GMML medium at 37°C for 12 h. *E. coli* BL21 (DE3) was used in the experiment.

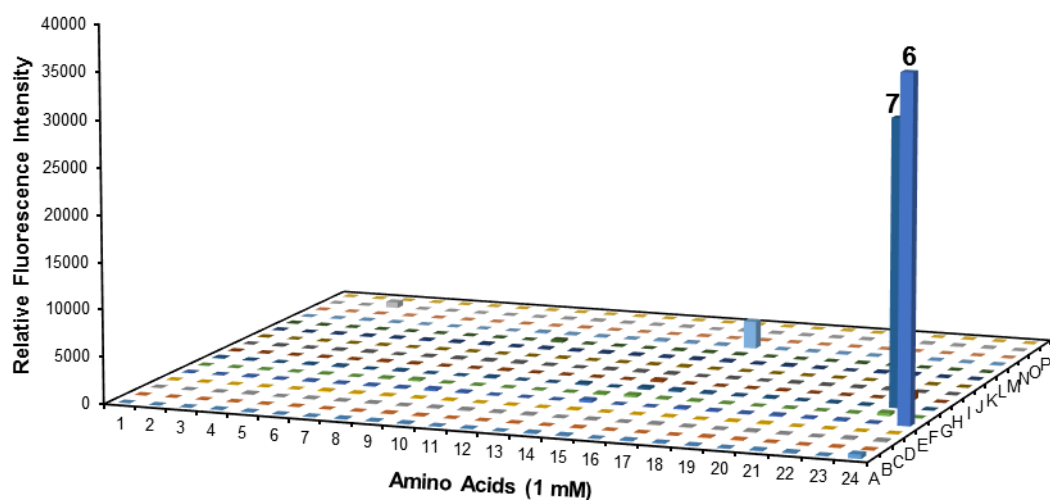

**Figure S36. Substrate range of N-ZRS•tRNA<sup>Pyl</sup><sub>CUA</sub> pair in producing sfGFP-UAG2 proteins.** *sfGFP-UAG2* gene read-through in ncAAs library was measured by fluorescence intensity. Twelve wells (A1-2, B1-2, and C1-2: without ncAAs and IPTG; D1-2, E1-2, and F1-2: without ncAAs but containing IPTG) were used as controls to measure background signals. Substrate specificity profiles of N-ZRS•tRNA<sup>Pyl</sup><sub>CUA</sub> pair were observed by *sfGFP-UAG2* gene suppression. The experiments were performed in the presence of 1 mM ncAAs and IPTG in GMML medium at 37°C for 12 h. *E. coli* BL21 (DE3) was used in the experiment.

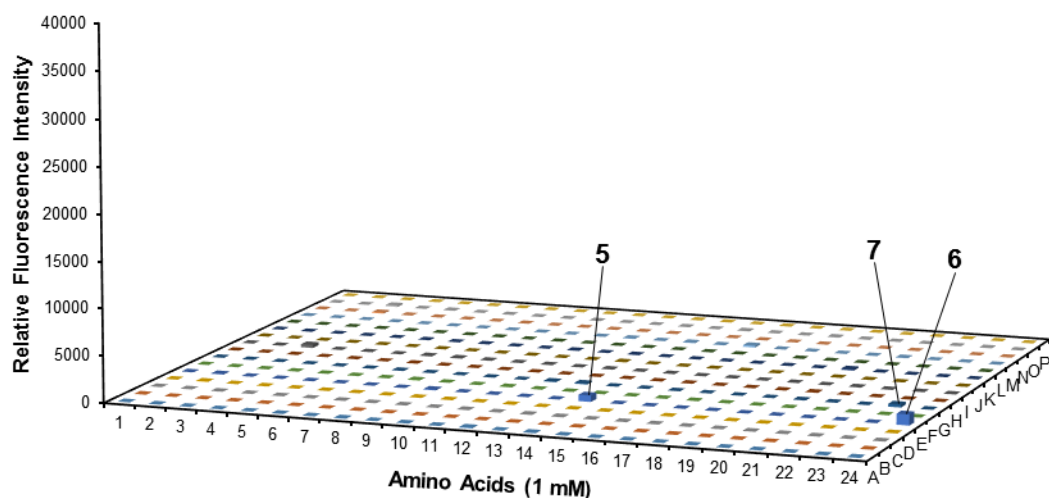

**Figure S37. Substrate range of ZRS•tRNA<sub>CUA</sub><sup>Pyl</sup> pair in producing sfGFP-UAG27 proteins.** *sfGFP-UAG27* gene read-through in ncAAs library was measured by fluorescence intensity. Twelve wells (A1-2, B1-2, and C1-2: without ncAAs and IPTG; D1-2, E1-2, and F1-2: without ncAAs but containing IPTG) were used as controls to measure background signals. Substrate specificity profiles of ZRS•tRNA<sub>CUA</sub><sup>Pyl</sup> pair were observed by *sfGFP-UAG27* gene suppression. The experiments were performed in the presence of 1 mM ncAAs and IPTG in GMML medium at 37°C for 12 h. *E. coli* BL21 (DE3) was used in the experiment.

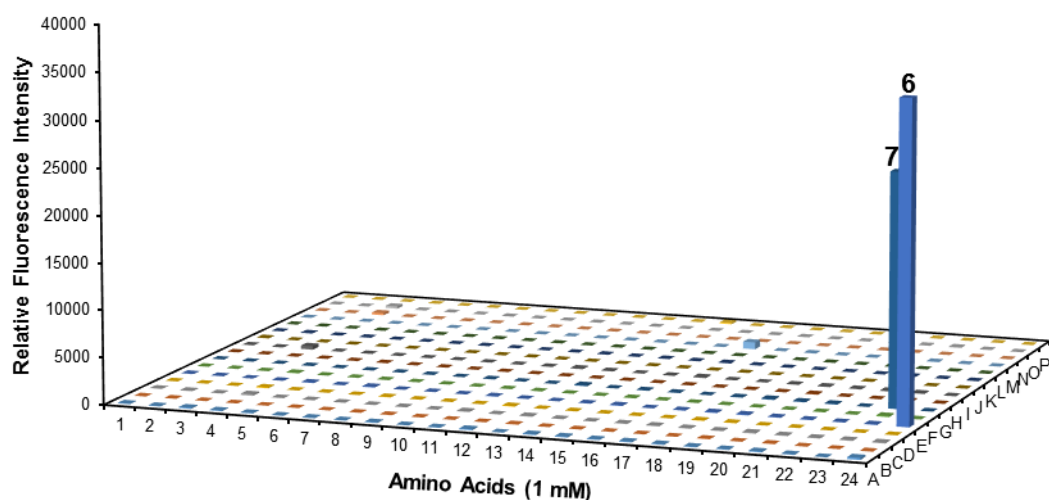

**Figure S38. Substrate range of ZRS•tRNA<sub>CUA</sub><sup>Pyl</sup> pair in producing sfGFP-UAG2 proteins.** *sfGFP-UAG2* gene read-through in ncAAs library was measured by fluorescence intensity. Twelve wells (A1-2, B1-2, and C1-2: without ncAAs and IPTG; D1-2, E1-2, and F1-2: without ncAAs but containing IPTG) were used as controls to measure background signals. Substrate specificity profiles of ZRS•tRNA<sub>CUA</sub><sup>Pyl</sup> pair were observed by *sfGFP-UAG2* gene suppression. The experiments were performed in the presence of 1 mM ncAAs and IPTG in GMML medium at 37°C for 12 h. *E. coli* BL21 (DE3) was used in the experiment.

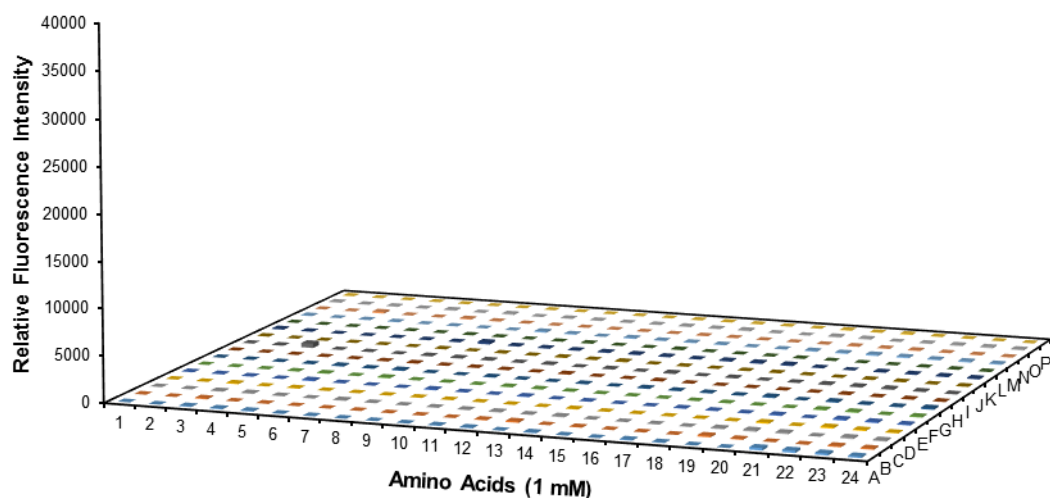

**Figure S39. Substrate range of ZRS-D1•tRNA<sub>CUA</sub><sup>Pyl</sup> pair in producing sfGFP-UAG27 proteins.** *sfGFP-UAG27* gene read-through in ncAAs library was measured by fluorescence intensity. Twelve wells (A1-2, B1-2, and C1-2: without ncAAs and IPTG; D1-2, E1-2, and F1-2: without ncAAs but containing IPTG) were used as controls to measure background signals. Substrate specificity profiles of ZRS-D1•tRNA<sub>CUA</sub><sup>Pyl</sup> pair were observed by *sfGFP-UAG27* gene suppression. The experiments were performed in the presence of 1 mM ncAAs and IPTG in GMML medium at 37°C for 12 h. *E. coli* BL21 (DE3) was used in the experiment.

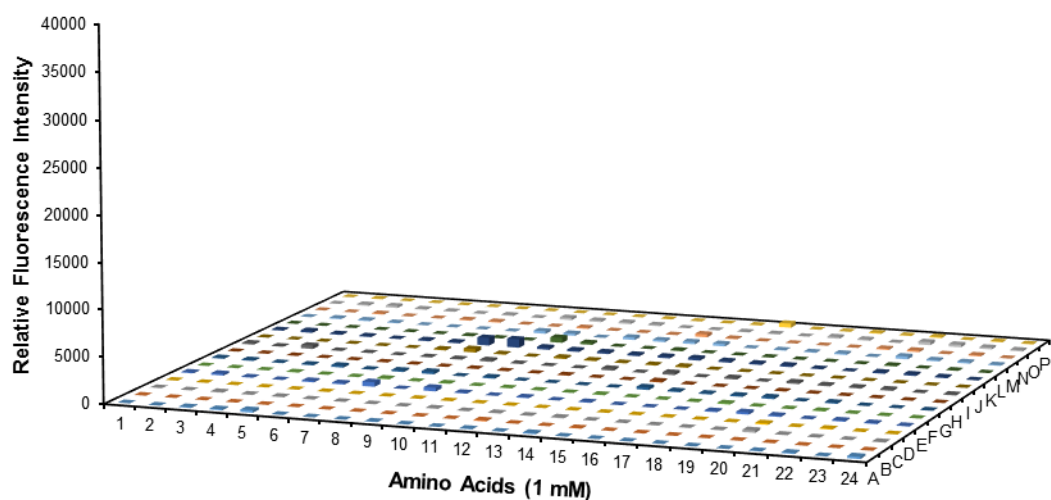

**Figure S40. Substrate range of ZRS-D1•tRNA<sub>CUA</sub><sup>Pyl</sup> pair in producing sfGFP-UAG2 proteins.** *sfGFP-UAG2* gene read-through in ncAAs library was measured by fluorescence intensity. Twelve wells (A1-2, B1-2, and C1-2: without ncAAs and IPTG; D1-2, E1-2, and F1-2: without ncAAs but containing IPTG) were used as controls to measure background signals. Substrate specificity profiles of ZRS-D1•tRNA<sub>CUA</sub><sup>Pyl</sup> pair were observed by *sfGFP-UAG2* gene suppression. The experiments were performed in the presence of 1 mM ncAAs and IPTG in GMML medium at 37°C for 12 h. *E. coli* BL21 (DE3) was used in the experiment.

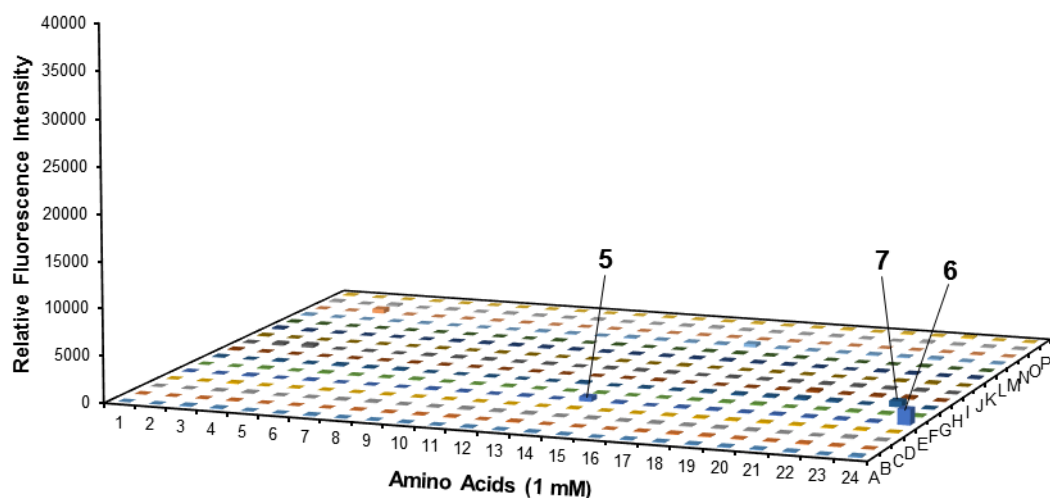

**Figure S41. Substrate range of ZRS-L1•tRNA<sub>CUA</sub><sup>Pyl</sup> pair in producing sfGFP-UAG27 proteins.** *sfGFP-UAG27* gene read-through in ncAAs library was measured by fluorescence intensity. Twelve wells (A1-2, B1-2, and C1-2: without ncAAs and IPTG; D1-2, E1-2, and F1-2: without ncAAs but containing IPTG) were used as controls to measure background signals. Substrate specificity profiles of ZRS-L1•tRNA<sub>CUA</sub><sup>Pyl</sup> pair were observed by *sfGFP-UAG27* gene suppression. The experiments were performed in the presence of 1 mM ncAAs and IPTG in GMML medium at 37°C for 12 h. *E. coli* BL21 (DE3) was used in the experiment.

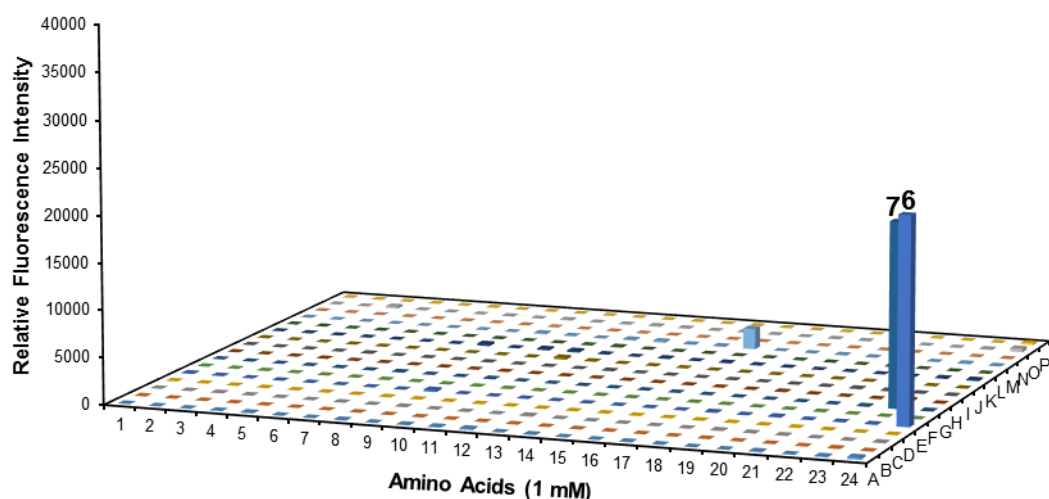

**Figure S42. Substrate range of ZRS-L1•tRNA<sub>CUA</sub><sup>Pyl</sup> pair in producing sfGFP-UAG2 proteins.** *sfGFP-UAG2* gene read-through in ncAAs library was measured by fluorescence intensity. Twelve wells (A1-2, B1-2, and C1-2: without ncAAs and IPTG; D1-2, E1-2, and F1-2: without ncAAs but containing IPTG) were used as controls to measure background signals. Substrate specificity profiles of ZRS-L1•tRNA<sub>CUA</sub><sup>Pyl</sup> pair were observed by *sfGFP-UAG2* gene suppression. The experiments were performed in the presence of 1 mM ncAAs and IPTG in GMML medium at 37°C for 12 h. *E. coli* BL21 (DE3) was used in the experiment.

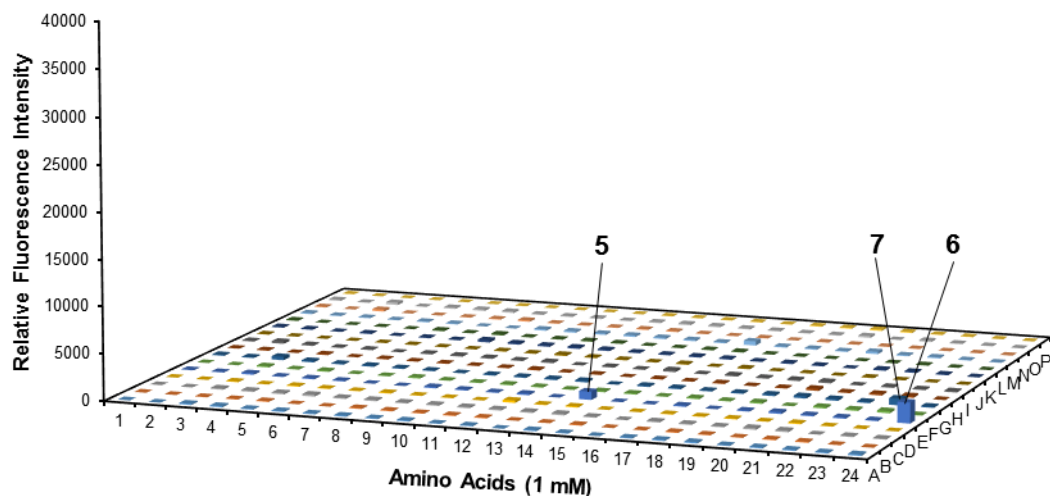

**Figure S43. Substrate range of ZRS-L2•tRNA<sub>CUA</sub><sup>Pyl</sup> pair in producing sfGFP-UAG27 proteins.** *sfGFP-UAG27* gene read-through in ncAAs library was measured by fluorescence intensity. Twelve wells (A1-2, B1-2, and C1-2: without ncAAs and IPTG; D1-2, E1-2, and F1-2: without ncAAs but containing IPTG) were used as controls to measure background signals. Substrate specificity profiles of ZRS-L2•tRNA<sub>CUA</sub><sup>Pyl</sup> pair were observed by *sfGFP-UAG27* gene suppression. The experiments were performed in the presence of 1 mM ncAAs and IPTG in GMLM medium at 37°C for 12 h. *E. coli* BL21 (DE3) was used in the experiment.

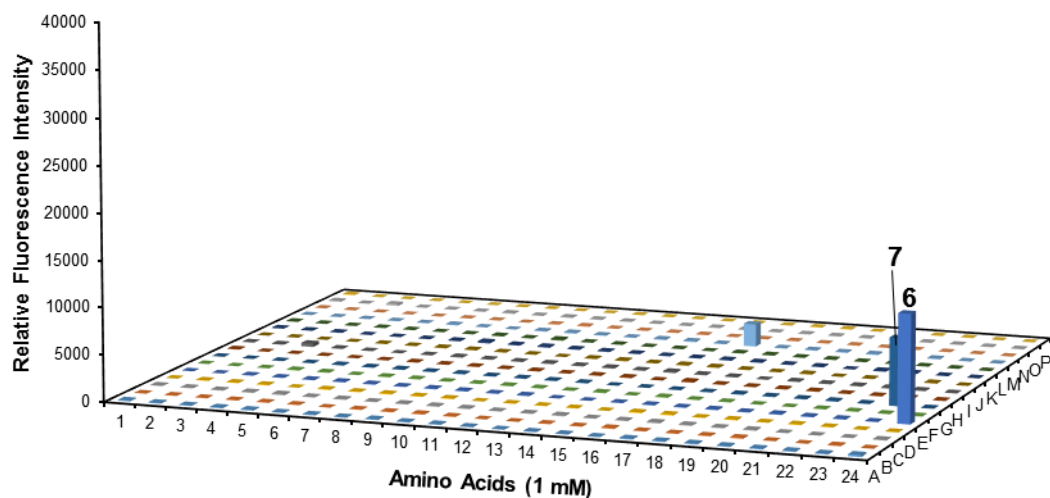

**Figure S44. Substrate range of ZRS-L2•tRNA<sub>CUA</sub><sup>Pyl</sup> pair in producing sfGFP-UAG2 proteins.** *sfGFP-UAG2* gene read-through in ncAAs library was measured by fluorescence intensity. Twelve wells (A1-2, B1-2, and C1-2: without ncAAs and IPTG; D1-2, E1-2, and F1-2: without ncAAs but containing IPTG) were used as controls to measure background signals. Substrate specificity profiles of ZRS-L2•tRNA<sub>CUA</sub><sup>Pyl</sup> pair were observed by *sfGFP-UAG2* gene suppression. The experiments were performed in the presence of 1 mM ncAAs and IPTG in GMLM medium at 37°C for 12 h. *E. coli* BL21 (DE3) was used in the experiment.

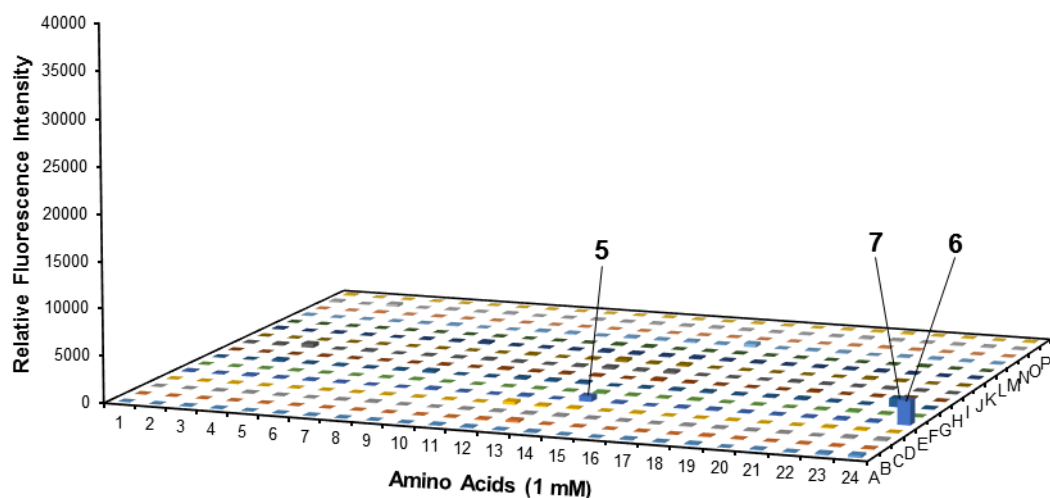

**Figure S45. Substrate range of  $ZRS-L3 \cdot tRNA_{CUA}^{Pyl}$  pair in producing sfGFP-UAG27 proteins.** *sfGFP-UAG27* gene read-through in ncAAs library was measured by fluorescence intensity. Twelve wells (A1-2, B1-2, and C1-2: without ncAAs and IPTG; D1-2, E1-2, and F1-2: without ncAAs but containing IPTG) were used as controls to measure background signals. Substrate specificity profiles of  $ZRS-L3 \cdot tRNA_{CUA}^{Pyl}$  pair were observed by *sfGFP-UAG27* gene suppression. The experiments were performed in the presence of 1 mM ncAAs and IPTG in GMML medium at 37°C for 12 h. *E. coli* BL21 (DE3) was used in the experiment.

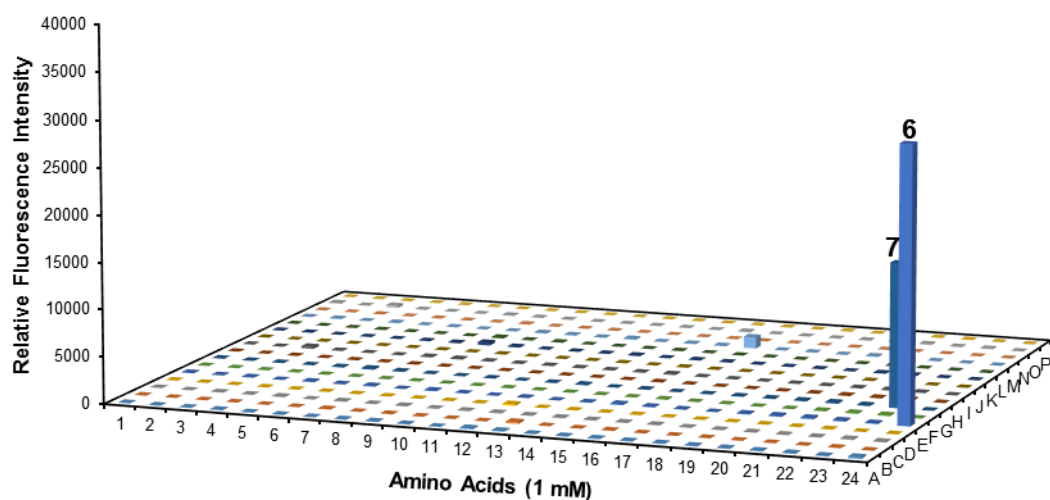

**Figure S46. Substrate range of  $ZRS-L3 \cdot tRNA_{CUA}^{Pyl}$  pair in producing sfGFP-UAG2 proteins.** *sfGFP-UAG2* gene read-through in ncAAs library was measured by fluorescence intensity. Twelve wells (A1-2, B1-2, and C1-2: without ncAAs and IPTG; D1-2, E1-2, and F1-2: without ncAAs but containing IPTG) were used as controls to measure background signals. Substrate specificity profiles of  $ZRS-L3 \cdot tRNA_{CUA}^{Pyl}$  pair were observed by *sfGFP-UAG2* gene suppression. The experiments were performed in the presence of 1 mM ncAAs and IPTG in GMML medium at 37°C for 12 h. *E. coli* BL21 (DE3) was used in the experiment.



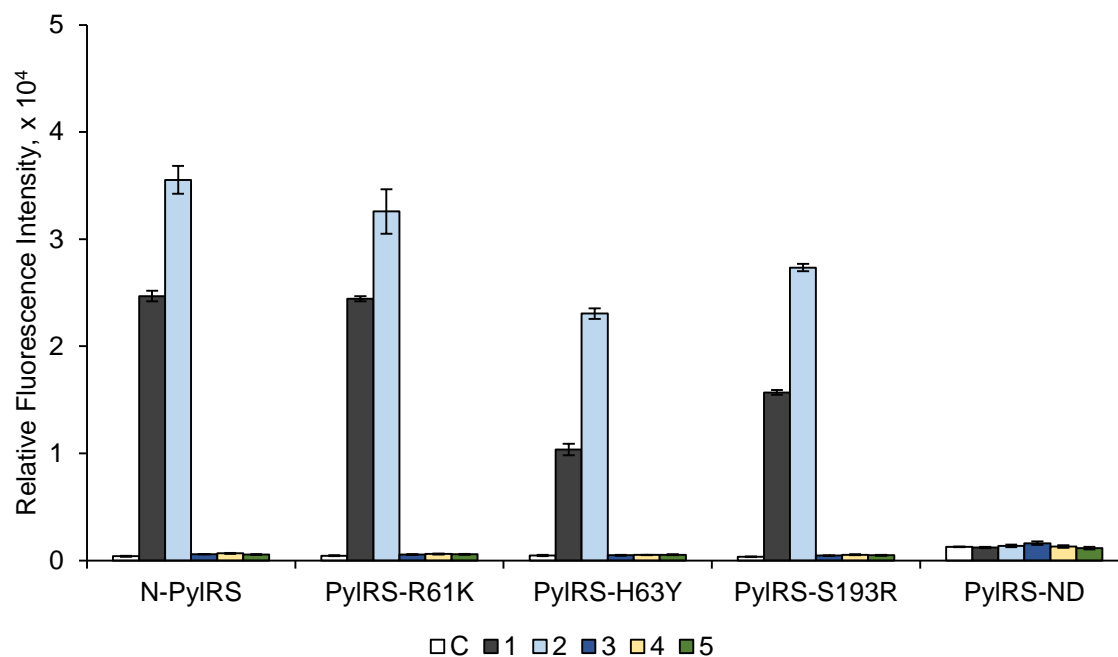

**Figure S47. The *sfGFP-UAG2* gene suppression efficiencies of PyIRS enzyme variants.**

Incorporation efficiencies of PyIRS variants as measured by fluorescence intensities of sfGFP with an amber mutation at position 2. Proteins were expressed in 1 mM ncAA and IPTG in GMLL medium at 37°C for 12 h. Cells were excited at 485 nm and the fluorescence intensities were detected at 535 nm. The cell density was monitored by absorbance at 595 nm. C indicates the control experiments that cells with the supplement of 1 mM IPTG; 1–5 denote the supplement of 1 mM IPTG and ncAA 1–5 (Scheme 1). Background signals from cells without adding IPTG were subtracted from each group. Error bars represent the standard deviation of sfGFP production from four repeated experiments.

## 4. Table S1. Chemical Names and Structures in ncAAs Library

| Position | CAS No.     | Name                                                 | Chemical Structure |
|----------|-------------|------------------------------------------------------|--------------------|
| A01      | N/A         | N/A                                                  | N/A                |
| A02      | N/A         | N/A                                                  | N/A                |
| A03      | 42538-40-9  | 2-Bromo-L-phenylalanine                              |                    |
| A04      | 57213-48-6  | 3-Cyano-L-phenylalanine                              |                    |
| A05      | 126109-42-0 | 4-Carboxy-L-phenylalanine                            |                    |
| A06      | 24250-85-9  | 4-Iodo-L-phenylalanine                               |                    |
| A07      | 111119-36-9 | L-2,4-Dichlorophenylalanine                          |                    |
| A08      | 2566-30-5   | N <sup>α</sup> -Methyl-L-phenylalanine hydrochloride |                    |
| A09      | 37535-49-2  | 3-(4'-Pyridyl)-L-alanine                             |                    |
| A10      | 31105-93-8  | 2,4-Difluoro-L-phenylalanine                         |                    |
| A11      | 515-30-0    | α-Phenylactic acid                                   |                    |
| A12      | 6636-22-2   | O-Acetyl-L-tyrosine                                  |                    |
| A13      | 1596-67-4   | L-Thyronine                                          |                    |
| A14      | 32381-18-3  | DL-α-Methylhistidine dihydrochloride                 |                    |

Supplementary Materials

|     |             |                                      |                                                                                       |
|-----|-------------|--------------------------------------|---------------------------------------------------------------------------------------|
| A15 | 154-08-5    | 5-Fluoro-DL-tryptophan               | 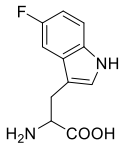   |
| A16 | 1954-45-6   | 4-Methyl-DL-tryptophan               |    |
| A17 | 638-23-3    | S-Carboxymethyl-L-cysteine           |    |
| A18 | 387868-34-0 | S-4-Methoxybenzyl-L-penicillamine    |    |
| A19 | 16338-48-0  | H-Allyl-L-glycine                    |    |
| A20 | 6600-40-4   | L-Norvaline                          |    |
| A21 | 62-57-7     | $\alpha$ -Aminoisobutyric acid       |  |
| A22 | 25528-71-6  | b-Cyclohexyl-L-alanine hydrochloride |  |
| A23 | 66638-22-0  | O-Acetyl-L-serine hydrochloride      |  |
| A24 | 692-04-6    | N <sup>ε</sup> -Acetyl-L-lysine      |  |
| B01 | N/A         | N/A                                  | N/A                                                                                   |
| B02 | N/A         | N/A                                  | N/A                                                                                   |
| B03 | 167817-55-2 | 2-Iodo-L-phenylalanine               |  |
| B04 | 19883-74-0  | 3-Nitro-L-phenylalanine              |  |
| B05 | 223593-04-2 | L-4-Carbamoylphenylalanine           |  |

Supplementary Materials

|     |             |                                            |                                                                                       |
|-----|-------------|--------------------------------------------|---------------------------------------------------------------------------------------|
| B06 | 155760-02-4 | H- <i>p</i> -Phenyl-L-Phenylalanine        | 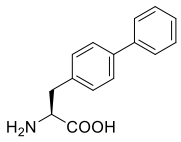   |
| B07 | 49607-21-8  | L-2,4-Dinitrophenylalanine                 |    |
| B08 | 62777-25-7  | L-2-Amino-5-phenylpentanoic acid           |    |
| B09 | 64090-98-8  | 3-(3'-Pyridyl)-L-alanine dihydrochloride   |    |
| B10 | 31105-91-6  | L-3,5-Difluorophenylalanine                |    |
| B11 | 149597-92-2 | 3,3-Diphenyl-L-alanine                     |   |
| B12 | 18835-59-1  | 3,5-Diiodo-L-tyrosine dihydrate            |  |
| B13 | 55-06-1     | 3,3',5-Triiodo-L-thyronine sodium salt     |  |
| B14 | 2002-22-4   | 2-Mercapto-L-histidine                     |  |
| B15 | 55516-54-6  | 3-(1-Naphthyl)-L-alanine                   |  |
| B16 | 33599-61-0  | 6-Bromo-DL-tryptophan                      |  |
| B17 | 28798-28-9  | S-Acetamidomethyl-L-cysteine hydrochloride |  |

Supplementary Materials

|     |              |                                                 |     |
|-----|--------------|-------------------------------------------------|-----|
| B18 | 1039102-11-8 | S-4-Methylbenzyl-L-penicillamine                |     |
| B19 | 144-24-1     | DL-α-Methylleucine                              |     |
| B20 | 6232-19-5    | β-Cyano-L-alanine                               |     |
| B21 | 54897-59-5   | DL-2,3-Diaminopropionic acid monohydrochloride  |     |
| B22 | 23235-01-0   | L-Propargylglycine                              |     |
| B23 | 18822-58-7   | O-tert-Butyl-L-serine                           |     |
| B24 | 2259-86-1    | N <sup>ε</sup> -Dimethyl-L-lysine hydrochloride |     |
| C01 | N/A          | N/A                                             | N/A |
| C02 | N/A          | N/A                                             | N/A |
| C03 | 263396-42-5  | 2-Cyano-L-phenylalanine                         |     |
| C04 | 19883-75-1   | 2-Nitro-L-phenylalanine                         |     |
| C05 | 122555-04-8  | L-4-Acetylphenylalanine                         |     |
| C06 | 949-99-5     | 4-Nitro-L-phenylalanine                         |     |
| C07 | 52794-99-7   | L-3,4-Dichlorophenylalanine                     |     |
| C08 | 267650-37-3  | 3-Styryl-L-alanine                              |     |

Supplementary Materials

|     |             |                                           |                                                                                       |
|-----|-------------|-------------------------------------------|---------------------------------------------------------------------------------------|
| C09 | 37535-51-6  | 3-(2'-Pyridyl)-L-alanine                  | 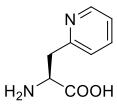   |
| C10 | 31105-90-5  | L-3,4-Difluorophenylalanine               |    |
| C11 | 57213-47-5  | L-3-Aminomethylphenylalanine              |    |
| C12 | 6230-11-1   | O-Methyl-L-tyrosine                       |    |
| C13 | 21820-51-9  | O-Phospho-L-tyrosine                      |    |
| C14 | 332-80-9    | 1-Methyl-L-Histidine                      |   |
| C15 | 72120-71-9  | 3-Benzothieryl-L-alanine                  |  |
| C16 | 852391-45-8 | 7-Bromo-DL-tryptophan                     |  |
| C17 | 2481-09-6   | S-tert-Butyl-L-cysteine hydrochloride     |  |
| C18 | 4099-35-8   | S-(2)-Aminoethyl-L-cysteine hydrochloride |  |
| C19 | 155239-51-3 | L-β-indanylglycine                        |  |
| C20 | 57224-50-7  | β-tert-Butyl-L-alanine                    |  |
| C21 | 594-61-6    | α-Hydroxyisobutyric acid                  |  |

Supplementary Materials

|     |              |                                               |                                                                                       |
|-----|--------------|-----------------------------------------------|---------------------------------------------------------------------------------------|
| C22 | 2521-84-8    | L-Cyclopentylglycine                          | 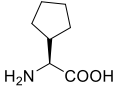   |
| C23 | 32595-59-8   | DL-β-(2-Thienyl)-serine                       |    |
| C24 | 55528-53-5   | N <sup>ε</sup> -(trimethyl)-L-lysine chloride |    |
| D01 | N/A          | N/A                                           | N/A                                                                                   |
| D02 | N/A          | N/A                                           | N/A                                                                                   |
| D03 | 14464-68-7   | 3-(Trifluoromethyl)-L-phenylalanine           |    |
| D04 | 1217651-22-3 | L-3-Carbamoylphenylalanine                    |    |
| D05 | 82372-74-5   | 4-tert-Butyl-L-phenylalanine                  |  |
| D06 | 943-80-6     | 4-Amino-L-phenylalanine                       |  |
| D07 | 32161-30-1   | L-3,4-Dimethoxyphenylalanine                  |  |
| D08 | 70663-55-7   | N-Methyl-4-nitro-L-phenylalanine              |  |
| D09 | 270262-99-2  | (3-Thienyl)-L-β-homoalanine                   |  |
| D10 | 749847-57-2  | L-2,4,5-Trifluorophenylalanine                |  |
| D11 | 621-44-3     | 3-Nitro-L-tyrosine                            |  |

Supplementary Materials

|     |              |                                                 |                                                                                       |
|-----|--------------|-------------------------------------------------|---------------------------------------------------------------------------------------|
| D12 | 51-48-9      | L-Thyroxine                                     | 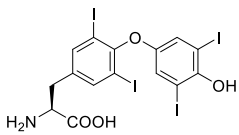   |
| D13 | 775-06-4     | DL- <i>m</i> -Tyrosine                          |    |
| D14 | 2022956-35-8 | <i>N</i> <sup>im</sup> -Benzyl-D-histidine      |    |
| D15 | 6383-69-3    | 5-Amino-DL-tryptophan                           |    |
| D16 | 153-91-3     | DL- $\alpha$ -Methyl-tryptophan                 |    |
| D17 | 30044-51-0   | S-tert-Butylthio-L-cysteine                     |   |
| D18 | 7314-32-1    | L-Methionine sulfone                            |  |
| D19 | 13748-90-8   | L- $\alpha$ -Hydroxyisocaproic acid             |  |
| D20 | 27527-05-5   | $\beta$ -Cyclohexyl-L-alanine                   |  |
| D21 | 1492-24-6    | L- $\alpha$ -Aminobutyric acid                  |  |
| D22 | 626-69-7     | O-Sulfo-L-serine                                |  |
| D23 | 10009-20-8   | <i>N</i> <sup>ε</sup> -Trifluoroacetyl-L-lysine |  |



Supplementary Materials

|     |             |                                                      |                                                                                       |
|-----|-------------|------------------------------------------------------|---------------------------------------------------------------------------------------|
| D24 | 7622-29-9   | <i>N</i> <sup>ε</sup> -Methyl-L-lysine hydrochloride | 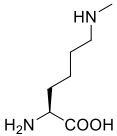   |
| E01 | N/A         | N/A                                                  | N/A                                                                                   |
| E02 | N/A         | N/A                                                  | N/A                                                                                   |
| E03 | 80126-51-8  | 3-Chloro-L-phenylalanine                             |    |
| E04 | 58438-03-2  | 3-(2-Naphthyl)-L-alanine                             |    |
| E05 | 1991-87-3   | 4-Methyl-L-phenylalanine                             |    |
| E06 | 104531-20-6 | 4-Cyano-L-phenylalanine                              |    |
| E07 | 2935-35-5   | L-Phenylglycine                                      |   |
| E08 | 3685-51-6   | $\beta$ -(3-Thienyl)-L-alanine                       |  |
| E09 | 19883-78-4  | 2-Fluoro-L-phenylalanine                             |  |
| E10 | 646066-73-1 | 3,4,5-Trifluoro-L-phenylalanine                      |  |
| E11 | 23279-22-3  | 3-Amino-L-tyrosine                                   |  |
| E12 | 7423-93-0   | 3-Chloro-L-tyrosine                                  |  |
| E13 | 17360-11-1  | 3,5-Dinitro-L-tyrosine monohydrate                   |  |

Supplementary Materials

|     |            |                                                     |                                                                                       |
|-----|------------|-----------------------------------------------------|---------------------------------------------------------------------------------------|
| E14 | 368-16-1   | H-N-3-Methyl-L-histidine                            | 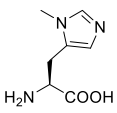   |
| E15 | 25631-05-4 | 4-Fluoro-DL-tryptophan                              |    |
| E16 | 25197-99-3 | 5-Bromo-L-tryptophan                                |    |
| E17 | 2544-31-2  | S-4-Methoxybenzyl-L-cysteine                        |    |
| E18 | 87392-13-0 | 4,5-Dehydro-L-leucine                               |    |
| E19 | 2566-29-2  | Diethylglycine                                      |    |
| E20 | 99295-82-6 | β-Cyclopentyl-L-alanine                             |   |
| E21 | 7685-44-1  | H-Allyl-DL-glycine                                  |  |
| E22 | 4726-96-9  | O-Benzyl-L-serine                                   |  |
| E23 | 10009-97-9 | N <sup>5</sup> -Phthaloyl-L-ornithine hydrochloride |  |
| E24 | 1155-64-2  | N <sup>ε</sup> -Z-L-lysine                          |  |
| F01 | N/A        | N/A                                                 | N/A                                                                                   |
| F02 | N/A        | N/A                                                 | N/A                                                                                   |
| F03 | 82311-69-1 | 3-Bromo-L-phenylalanine                             |  |

Supplementary Materials

|     |              |                                           |                                                                                       |
|-----|--------------|-------------------------------------------|---------------------------------------------------------------------------------------|
| F04 | 150338-20-8  | 4-(Aminomethyl)-L-phenylalanine           | 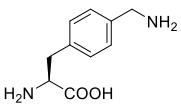   |
| F05 | 114926-38-4  | <i>p</i> -Trifluoromethyl-L-phenylalanine |    |
| F06 | 1080496-42-9 | 4-Propargyloxy-L-phenylalanine            |    |
| F07 | 943-73-7     | L-Homophenylalanine                       |    |
| F08 | 22951-96-8   | $\beta$ -(2-Thienyl)-L-alanine            |    |
| F09 | 19883-77-3   | 3-Fluoro-L-phenylalanine                  |   |
| F10 | 138109-65-6  | Pentafluoro-L-phenylalanine               |  |
| F11 | 21106-04-7   | O-Z-L-tyrosine                            |  |
| F12 | 300-38-9     | L-3,5-Dibromotyrosine                     |  |
| F13 | 119433-80-6  | 3-(4-Thiazolyl)-L-alanine                 |  |
| F14 | 161513-46-8  | 3-(2'-Quinoly)-L-alanine                  |  |
| F15 | 7730-20-3    | 6-Fluoro-DL-tryptophan                    |  |

Supplementary Materials

|     |             |                                           |                                                                                       |
|-----|-------------|-------------------------------------------|---------------------------------------------------------------------------------------|
| F16 | 17332-70-6  | 7-Methyl-DL-tryptophan                    | 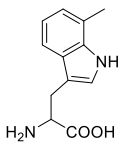   |
| F17 | 42294-52-0  | S-4-Methylbenzyl-L-cysteine               |    |
| F18 | 96386-92-4  | L-Homoleucine Hydrochloride               |    |
| F19 | 1883-09-6   | L-2,4-Diaminobutyric acid dihydrochloride |    |
| F20 | 102735-53-5 | H-β-Cyclopropyl-L-Alanine                 |    |
| F21 | 14328-51-9  | L-2-Cyclohexylglycine                     |    |
| F22 | 32595-59-8  | DL-β-(2-Thienyl)-serine                   |   |
| F23 | 3557-90-2   | N <sup>ε</sup> -4-Nitro-Z-L-lysine        |  |
| F24 | 2418-95-3   | N <sup>ε</sup> -Boc-L-Lysine              |  |
| G01 | 80126-53-0  | 2-Methyl-L-phenylalanine                  |  |
| G02 | 193546-31-5 | L-2-Methoxyphenylalanine                  |  |
| G03 | 20846-39-3  | 3-Iodo-L-phenylalanine                    |  |

Supplementary Materials

|     |             |                                                      |                                                                                       |
|-----|-------------|------------------------------------------------------|---------------------------------------------------------------------------------------|
| G04 | 74578-48-6  | 4-(Boc-amino)-L-phenylalanine                        | 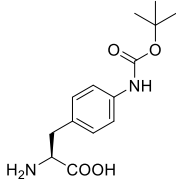   |
| G05 | 14173-39-8  | 4-Chloro-L-phenylalanine                             |    |
| G06 | 104504-45-2 | 4-Benzoyl-L-phenylalanine                            |    |
| G07 | 23239-35-2  | $\alpha$ -Methyl-L-phenylalanine                     |    |
| G08 | 127682-08-0 | H- $\beta$ -(2-Furyl)-L-alanine                      |    |
| G09 | 1132-68-9   | 4-Fluoro-L-phenylalanine                             |   |
| G10 | 889957-22-6 | ( <i>R,S</i> )-2-Hydroxy-3-(3-pyridyl)propionic acid |  |
| G11 | 16652-64-5  | O-Benzyl-L-tyrosine                                  |  |
| G12 | 40298-69-9  | O-2,6-Dichlorobenzyl-L-tyrosine                      |  |
| G13 | 1596-65-2   | $\beta$ -(2-Thiazolyl)-DL-alanine                    |  |
| G14 | 4350-09-8   | 5-Hydroxy-L-tryptophan                               |  |
| G15 | 146645-63-8 | <i>N</i> <sup>in</sup> -Boc-L-tryptophan             |  |

Supplementary Materials

|     |             |                                            |                                                                                       |
|-----|-------------|--------------------------------------------|---------------------------------------------------------------------------------------|
| G16 | 1821-52-9   | DL-Indole-3-lactic acid                    | 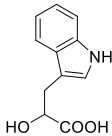   |
| G17 | 3054-01-1   | S-Benzyl-L-cysteine                        |    |
| G18 | 20859-02-3  | L- $\alpha$ - <i>tert</i> -Butyl-Gly-OH    |    |
| G19 | 1509-34-8   | L-allo-Isoleucine                          |    |
| G20 | 1492-24-6   | L- $\alpha$ -Aminobutyric acid             |    |
| G21 | 33105-81-6  | DL- $\alpha$ - <i>tert</i> -Butylglycine   |    |
| G22 | 407-41-0    | O-Phospho-L-serine                         |    |
| G23 | 42390-97-6  | <i>N</i> <sup>ε</sup> -2-Chloro-Z-L-lysine |  |
| G24 | 3184-13-2   | L-Ornithine hydrochloride                  |  |
| H01 | 119009-47-1 | H-L-Phe(2-trifluoromethyl)-OH              |  |
| H02 | 103616-89-3 | 2-Chloro-L-phenylalanine                   |  |
| H03 | 57213-47-5  | L-3-Aminomethylphenylalanine               |  |
| H04 | 33173-53-4  | 4-Azido-L-phenylalanine                    |  |

Supplementary Materials

|     |             |                                                           |                                                                                       |
|-----|-------------|-----------------------------------------------------------|---------------------------------------------------------------------------------------|
| H05 | 24250-84-8  | 4-Bromo-L-phenylalanine                                   | 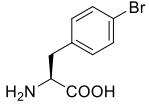   |
| H06 | 259726-56-2 | L-2,4-Dimethylphenylalanine                               |    |
| H07 | 130855-57-1 | $\alpha$ -Methyl-L-4-Fluorophenylalanine                  |    |
| H08 | 154593-58-5 | L-2-(5-Bromothieryl)alanine                               |    |
| H09 | 33787-05-2  | 2,6-Difluoro-L-phenylalanine                              |    |
| H10 | 20312-36-1  | L- $\beta$ -Phenyllactic acid                             |    |
| H11 | 18822-59-8  | O- <i>tert</i> -Butyl-L-tyrosine                          |   |
| H12 | 52939-33-0  | <i>N</i> -Methyl-O-methyl-L-tyrosine hydrochloride        |  |
| H13 | 16832-24-9  | <i>N</i> <sup>im</sup> -Benzyl-L-histidine                |  |
| H14 | 25197-96-0  | 5-Methoxy-L-tryptophan                                    |  |
| H15 | 38023-86-8  | <i>N</i> <sup>im</sup> -Formyl-L-tryptophan hydrochloride |  |
| H16 | 5191-80-0   | S-Diphenylmethyl-L-cysteine                               |  |
| H17 | 1113-41-3   | L-Penicillamine                                           |  |

## Supplementary Materials

|     |             |                                                                               |                                                                                       |
|-----|-------------|-------------------------------------------------------------------------------|---------------------------------------------------------------------------------------|
| H18 | 2566-31-6   | Di-n-propylglycine                                                            | 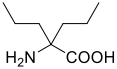   |
| H19 | 17407-55-5  | L- $\alpha$ -Hydroxyisovaleric acid                                           |    |
| H20 | 2731-73-9   | $\beta$ -Chloro-L-alanine                                                     |    |
| H21 | 208660-68-8 | H- $\beta$ -(7-Methoxycoumarin-4-yl)-Ala-OH                                   |    |
| H22 | 672-15-1    | L-Homoserine                                                                  |    |
| H23 | 6298-03-9   | $N^{\epsilon}$ -Allyloxycarbonyl-L-lysine                                     |    |
| H24 | 156463-09-1 | $N^{\delta}$ -Azido-L-Ornithine hydrochloride                                 |   |
| I01 | 1190-49-4   | L-Homocitrulline                                                              |  |
| I02 | 200116-81-0 | $N^{\omega}$ -(2,2,4,6,7-Pentamethylidihydrobenzofuran)-5-sulfonyl-D-arginine |  |
| I03 | 2922-83-0   | L-Kynurenine                                                                  |  |
| I04 | 112471-82-6 | L-Glutamic acid- $\gamma$ -cyclohexyl ester                                   |  |
| I05 | 61884-74-0  | L- $\beta$ -Homoglutamic acid hydrochloride                                   |  |



Supplementary Materials

|     |              |                                                                |                                                                                       |
|-----|--------------|----------------------------------------------------------------|---------------------------------------------------------------------------------------|
| I06 | 2438-57-5    | <i>cis</i> -4-Fluoro-L-proline                                 | 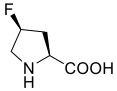   |
| I07 | 1279049-67-0 | ( <i>R</i> )- $\gamma$ -Benzyl-L-proline-HCl                   |    |
| I08 | 103733-65-9  | (3 <i>R</i> )-1,2,3,4-Tetrahydroisoquinoline-3-carboxylic acid |    |
| I09 | 54631-81-1   | Boc- <i>O</i> -benzyl-L- <i>trans</i> -4-hydroxyproline        |    |
| I10 | 56-86-0      | L-Glutamic acid                                                |    |
| I11 | 72-19-5      | L-Threonine                                                    |    |
| I12 | 5959-95-5    | D-Glutamine                                                    |  |
| I13 | 157-06-2     | D-Arginine                                                     |  |
| I14 | 153-94-6     | D-tryptophan                                                   |  |
| I15 | 169530-97-6  | 3-Nitro-D-phenylalanine                                        |  |
| I16 | 2578-33-8    | D-Glutamic acid- $\gamma$ -benzyl ester                        |  |
| I17 | 264903-53-9  | 3-Styryl-D-alanine                                             |  |

Supplementary Materials

|     |             |                                                 |                                                                                       |
|-----|-------------|-------------------------------------------------|---------------------------------------------------------------------------------------|
| I18 | 270063-44-0 | L-β-HomoAla(3-benzothieryl)-OH·HCl              | 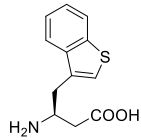   |
| I19 | 270062-92-5 | 3-Methyl-L-β-homophenylalanine hydrochloride    |    |
| I20 | 439918-59-9 | D-β-Homoproline.HCl                             |    |
| I21 | 567-35-1    | cis-L-3-Hydroxyproline                          |    |
| I22 | 80126-50-7  | 2-Chloro-D-phenylalanine                        |    |
| I23 | 49759-61-7  | 4-Methyl-D-phenylalanine                        |    |
| I24 | 21339-55-9  | 1-Methyl-L-tryptophan                           |   |
| J01 | 156-86-5    | L-Homoarginine                                  |  |
| J02 | 156706-47-7 | N <sup>ω</sup> -Methyl-L-arginine hydrochloride |  |
| J03 | 1483-07-4   | 3-[(Aminocarbony)amino]-L-alanine               |  |
| J04 | 4311-12-0   | N <sup>ε</sup> -Isopropyl-L-glutamine           |  |
| J05 | 2643-70-1   | γ-Glu-4-Abz-OH                                  |  |

Supplementary Materials

|     |              |                                                                 |                                                                                       |
|-----|--------------|-----------------------------------------------------------------|---------------------------------------------------------------------------------------|
| J06 | 1049734-52-2 | ( <i>R</i> )- $\gamma$ -(3-Methylbenzyl)-L-proline              | 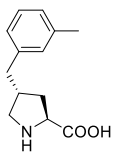   |
| J07 | 79775-07-8   | <i>O</i> - <i>tert</i> -Butyl-L- <i>trans</i> -4-hydroxyproline |    |
| J08 | 19771-63-2   | L-Thiazolidin-2-one-4-carboxylic acid                           |    |
| J09 | 2133-34-8    | L-Azetidine-2-carboxylic acid                                   |    |
| J10 | 71-00-1      | L-Histidine                                                     |    |
| J11 | 73-22-3      | L-tryptophan                                                    |    |
| J12 | 328-38-1     | D-Leucine                                                       |   |
| J13 | 2058-58-4    | D-Asparagine hydrate                                            |  |
| J14 | 56564-52-4   | <i>N</i> <sup>α</sup> -Methyl-D-phenylalanine hydrochloride     |  |
| J15 | 80126-52-9   | 3-Chloro-D-phenylalanine                                        |  |
| J16 | 45125-00-6   | D-Glutamic acid- $\gamma$ - <i>tert</i> -butyl ester            |  |
| J17 | 52-67-5      | D-Penicillamine                                                 |  |
| J18 | 270063-41-7  | Pentafluoro-L- $\beta$ -homophenylalanine hydrochloride         |  |
| J19 | 270596-38-8  | 3-Chloro-L- $\beta$ -homophenylalanine hydrochloride            |  |

Supplementary Materials

|     |              |                                                            |                                                                                       |
|-----|--------------|------------------------------------------------------------|---------------------------------------------------------------------------------------|
| J20 | 133367-32-5  | $N^{im}$ -4-Methyltrityl-L-histidine                       | 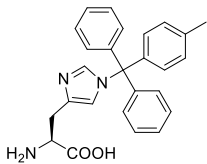   |
| J21 | 736184-44-4  | 2-Iodo-D-phenylalanine                                     |    |
| J22 | 263396-44-7  | 4-Cyano-D-phenylalanine                                    |    |
| J23 | 114926-37-3  | 3-Methyl-L-phenylalanine                                   |    |
| J24 | N/A          | N/A                                                        | N/A                                                                                   |
| K01 | 200115-86-2  | L-Arg(Pbf)-OH                                              |    |
| K02 | 2149-70-4    | $N^{no}$ -Nitro-L-arginine                                 |   |
| K03 | 2419-56-9    | L-Glutamic acid- $\gamma$ -tert-butyl ester                |  |
| K04 | 3081-61-6    | $N^{\gamma}$ -Ethyl-L-glutamine                            |  |
| K05 | 14525-44-1   | L-Glutamic acid- $\gamma$ -( $\beta$ -naphthylamide)       |  |
| K06 | 1049755-32-9 | ( <i>R</i> )- $\gamma$ -Propynyl-L-proline-HCl             |  |
| K07 | 66831-16-1   | O-Benzyl-L- <i>trans</i> -L-4-hydroxyproline hydrochloride |  |

Supplementary Materials

|     |             |                                                 |                                                                                       |
|-----|-------------|-------------------------------------------------|---------------------------------------------------------------------------------------|
| K08 | 42438-90-4  | L-1,2,3,4-Tetrahydronorharman-3-carboxylic acid | 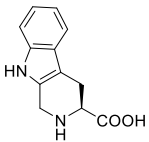   |
| K09 | 56-40-6     | Glycine                                         |    |
| K10 | 61-90-5     | L-Leucine                                       |    |
| K11 | 60-18-4     | L-Tyrosine                                      |    |
| K12 | 673-06-3    | D-Phenylalanine                                 |    |
| K13 | 351-50-8    | D-Histidine                                     |    |
| K14 | 7326-19-4   | D-β-Phenyllactic acid                           |   |
| K15 | 114926-39-5 | 3-Methyl-D-phenylalanine                        |  |
| K16 | 51621-57-9  | N <sup>ε</sup> -Acetyl-D-lysine                 |  |
| K17 | 2584-71-6   | cis-D-4-Hydroxyproline                          |  |
| K18 | 275826-34-1 | (S)-3-Amino-3-(2-bromophenyl)propionic acid     |  |
| K19 | 270596-38-8 | 3-Chloro-L-homophenylalanine hydrochloride      |  |
| K20 | 35146-32-8  | N <sup>im</sup> -Trityl-histidine               |  |

Supplementary Materials

|     |              |                                                             |                                                                                       |
|-----|--------------|-------------------------------------------------------------|---------------------------------------------------------------------------------------|
| K21 | 14091-08-8   | 4-Chloro-D-phenylalanine                                    | 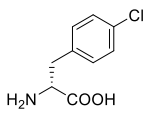   |
| K22 | 122839-51-4  | 2-Fluoro-D-phenylalanine                                    |    |
| K23 | 170642-31-6  | D-2-Methoxyphenylalanine                                    |    |
| K24 | N/A          | N/A                                                         | N/A                                                                                   |
| L01 | 4125-79-5    | $N^\omega, N^\omega$ -Di-Z-L-arginine                       |    |
| L02 | 4353-32-6    | $N^\omega$ -(4-Toluenesulfonyl)-L-arginine                  |    |
| L03 | 5963-60-0    | L-Glutamic acid- $\gamma$ -anilide                          |   |
| L04 | 5963-60-0    | L-Glutamic acid- $\gamma$ -anilide                          |  |
| L05 | 336182-11-7  | L- $\beta$ -Homohydroxyproline hydrochloride                |  |
| L06 | 1049743-68-1 | ( <i>R</i> )- $\gamma$ -(4-Trifluoromethylbenzyl)-L-proline |  |
| L07 | 51-35-4      | <i>trans</i> -L-4-Hydroxyproline                            |  |
| L08 | 152286-30-1  | 7-hydroxy-D-Tic-OH                                          |  |
| L09 | 56-41-7      | L-Alanine                                                   |  |

Supplementary Materials

|     |             |                                              |                                                                                       |
|-----|-------------|----------------------------------------------|---------------------------------------------------------------------------------------|
| L10 | 63-68-3     | L-Methionine                                 | 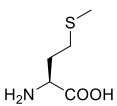   |
| L11 | 72-18-4     | L-Valine                                     |    |
| L12 | 312-84-5    | D-Serine                                     |    |
| L13 | 632-20-2    | D-Threonine                                  |    |
| L14 | 331763-65-6 | 3-Fluoro-D-β-homophenylalanine hydrochloride |    |
| L15 | 14464-67-6  | 3-Trifluoromethyl-D-phenylalanine            |    |
| L16 | 31202-69-4  | N <sup>ε</sup> -Boc-D-lysine                 |   |
| L17 | 1723-00-8   | D-Homoproline                                |  |
| L18 | 151911-32-9 | (S)-3-Amino-3-(2-fluorophenyl)propionic acid |  |
| L19 | 270065-91-3 | (2-Thienyl)-L-β-homoalanine hydrochloride    |  |
| L20 | 84888-34-6  | S-9-Fluorenylmethyl-L-cysteine hydrochloride |  |
| L21 | 18125-46-7  | 4-Fluoro-D-phenylalanine                     |  |
| L22 | 62561-75-5  | 4-Iodo-D-phenylalanine                       |  |

Supplementary Materials

|     |              |                                                                              |                                                                                       |
|-----|--------------|------------------------------------------------------------------------------|---------------------------------------------------------------------------------------|
| L23 | 145306-65-6  | D-3-Methoxyphenylalanine                                                     | 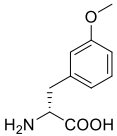   |
| L24 | N/A          | N/A                                                                          | N/A                                                                                   |
| M01 | 80745-10-4   | <i>N</i> <sup>ω</sup> -(4-Methoxy-2,3,6-trimethylbenzenesulfonyl)-L-arginine |    |
| M02 | 2177-63-1    | L-Aspartic acid β-benzyl ester                                               |    |
| M03 | 1119-33-1    | L-Glutamic acid-γ-ethyl ester                                                |    |
| M04 | 67953-08-6   | L-Glutamic acid-γ-(p-nitroanilide) hydrochloride                             |    |
| M05 | 213475-47-9  | L-2,2-Dimethyl-thiaproline hydrochloride                                     |   |
| M06 | 1049740-11-5 | ( <i>R</i> )-γ-(3-Nitrobenzyl)-L-proline·HCl                                 |  |
| M07 | 4043-88-3    | 3,4-Dehydro-L-proline                                                        |  |
| M08 | 618-27-9     | <i>cis</i> -L-4-Hydroxyproline                                               |  |
| M09 | 74-79-3      | L-Arginine                                                                   |  |
| M10 | 63-91-2      | L-Phenylalanine                                                              |  |
| M11 | 52-90-4      | L-Cysteine                                                                   |  |
| M12 | 556-02-5     | D-Tyrosine                                                                   |  |



Supplementary Materials

|     |             |                                              |                                                                                       |
|-----|-------------|----------------------------------------------|---------------------------------------------------------------------------------------|
| M13 | 348-67-4    | D-Methionine                                 | 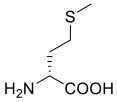   |
| M14 | 263396-43-6 | 3-Cyano-D-phenylalanine                      |    |
| M15 | 20312-37-2  | D-α-Hydroxyisocaproic acid                   |    |
| M16 | 201014-19-9 | N <sup>ε</sup> -2-Chloro-Z-D-lysine          |    |
| M17 | 45521-09-3  | D-Thiaproline                                |    |
| M18 | 270596-50-4 | 3-Fluoro-L-β-homophenylalanine hydrochloride |   |
| M19 | N/A         | N/A                                          | N/A                                                                                   |
| M20 | 144317-20-4 | N <sup>ε</sup> -4-Methyltrityl-L-asparagine  |  |
| M21 | 56613-61-7  | 4-Nitro-D-phenylalanine monohydrate          |  |
| M22 | 130930-49-3 | H-D-Phe(2-trifluoromethyl)-OH                |  |
| M23 | 80126-54-1  | 2-Methyl-D-phenylalanine                     |  |
| M24 | N/A         | N/A                                          | N/A                                                                                   |
| N01 | 121080-96-4 | D-Homocitrulline                             |  |

Supplementary Materials

|     |              |                                                          |  |
|-----|--------------|----------------------------------------------------------|--|
| N02 | 112259-66-2  | L-Aspartic acid- $\beta$ -cyclohexyl ester               |  |
| N03 | 2922-83-0    | L-Kynurenine                                             |  |
| N04 | 1499-55-4    | L-Glutamic acid- $\gamma$ -methyl ester                  |  |
| N05 | 53912-85-9   | L- $\beta$ -Homoproline hydrochloride                    |  |
| N06 | 1049745-26-7 | ( <i>R</i> )- $\gamma$ -(4-Biphenylmethyl)-L-proline-HCl |  |
| N07 | 128502-56-7  | 7-hydroxy-L-Tic-OH                                       |  |
| N08 | 79815-20-6   | L-Indoline-2-carboxylic acid                             |  |
| N09 | 5794-13-8    | L-Asparagine monohydrate                                 |  |
| N10 | 147-85-3     | L-Proline                                                |  |
| N11 | 56-87-1      | L-Lysine                                                 |  |
| N12 | 640-68-6     | D-Valine                                                 |  |
| N13 | 319-78-8     | D-Isoleucine                                             |  |
| N14 | 110117-84-5  | 3-Fluoro-D-phenylalanine                                 |  |

## Supplementary Materials

|     |             |                                                                      |     |
|-----|-------------|----------------------------------------------------------------------|-----|
| N15 | 17407-56-6  | D- $\alpha$ -Hydroxyisovaleric acid                                  |     |
| N16 | 274260-42-3 | N <sup>ε</sup> -Allyloxycarbonyl-D-lysine                            |     |
| N17 | 201290-11-1 | N <sup>in</sup> -Boc-D-tryptophan                                    |     |
| N18 | 719995-40-1 | (S)-3-Amino-3-(3-trifluoromethylphenyl)propionic acid                |     |
| N19 | 269398-82-5 | 3-Methyl-D- $\beta$ -homophenylalanine hydrochloride                 |     |
| N20 | 84624-28-2  | N <sup>ε</sup> -Fmoc-L-lysine                                        |     |
| N21 | 263396-41-4 | 2-Cyano-D-phenylalanine                                              |     |
| N22 | 39878-65-4  | O-Methyl-D-tyrosine                                                  |     |
| N23 | 267225-27-4 | 2-Bromo-D-phenylalanine                                              |     |
| N24 | N/A         | N/A                                                                  | N/A |
| O01 | 112160-37-9 | N <sup>ω</sup> -(2,2,5,7,8-Pentamethylchroman-6-sulfonyl)-L-arginine |     |
| O02 | 16856-13-6  | L-Aspartic acid- $\beta$ -methyl ester hydrochloride                 |     |
| O03 | 1118-90-7   | L- $\alpha$ -Amino adipic acid                                       |     |

Supplementary Materials

|     |              |                                                       |                                                                                       |
|-----|--------------|-------------------------------------------------------|---------------------------------------------------------------------------------------|
| O04 | 122864-94-2  | L-Glutamic acid 5-(4-nitroanilide) monohydrate        | 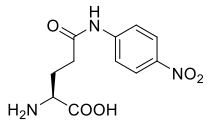   |
| O05 | 3105-95-1    | L-Homoproline                                         |    |
| O06 | 1049733-88-1 | (R)-γ-(4-Chlorobenzyl)-L-proline                      |    |
| O07 | 74163-81-8   | (3S)-1,2,3,4-Tetrahydroisoquinoline-3-carboxylic acid |    |
| O08 | 34592-47-7   | L-Thiaproline                                         |    |
| O09 | 56-84-8      | L-Aspartic acid                                       |    |
| O10 | 73-32-5      | L-Isoleucine                                          |   |
| O11 | 338-69-2     | D-Alanine                                             |  |
| O12 | 344-25-2     | D-Proline                                             |  |
| O13 | 923-27-3     | D-Lysine                                              |  |
| O14 | 99295-78-0   | 3-Bromo-D-phenylalanine                               |  |
| O15 | 66036-77-9   | N <sup>ω</sup> -Nitro-D-arginine                      |  |
| O16 | 269398-95-0  | D-β-HomoAla(3-benzothiényl)-OH                        |  |

## Supplementary Materials

|     |             |                                                                             |                                                                                       |
|-----|-------------|-----------------------------------------------------------------------------|---------------------------------------------------------------------------------------|
| O17 | 367453-01-8 | <i>N</i> <sup>in</sup> -Formyl-D-tryptophan                                 | 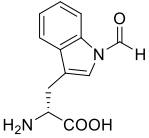   |
| O18 | 270065-85-5 | 3-Cyano-L-β-homophenylalanine                                               |    |
| O19 | 331763-55-4 | 3-Chloro-D-β-homophenylalanine                                              |    |
| O20 | 2799-07-7   | <i>S</i> -Trityl-L-cysteine                                                 |    |
| O21 | 114872-99-0 | <i>p</i> -Trifluoromethyl-D-phenylalanine                                   |    |
| O22 | 126257-07-6 | 4-Amino-D-phenylalanine                                                     |   |
| O23 | N/A         | N/A                                                                         | N/A                                                                                   |
| O24 | N/A         | N/A                                                                         | N/A                                                                                   |
| P01 | 191869-60-0 | <i>N</i> <sup>ω</sup> -(2,2,5,7,8-Pentamethylchroman-6-sulfonyl)-D-arginine |  |
| P02 | 3057-74-7   | L-Aspartic acid-β-tert-butyl ester                                          |  |
| P03 | 1676-73-9   | L-Glutamic acid-γ-benzyl ester                                              |  |
| P04 | 1119-33-1   | L-Glutamic acid-γ-ethyl ester                                               |  |
| P05 | 2507-61-1   | <i>trans</i> -4-Fluoro-L-proline                                            |  |

Supplementary Materials

|     |              |                                                                  |                                                                                       |
|-----|--------------|------------------------------------------------------------------|---------------------------------------------------------------------------------------|
| P06 | 1049734-62-4 | ( <i>R</i> )- $\gamma$ -(4-Methylbenzyl)-L-proline               | 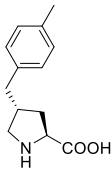   |
| P07 | 59981-63-4   | L-4,5,6,7-Tetrahydro-1H-imidazo[4,5-c]pyridine-6-carboxylic acid |    |
| P08 | 892128-58-4  | (4 <i>S</i> )-Azido-L-Proline                                    |    |
| P09 | 56-85-9      | L-Glutamine                                                      |    |
| P10 | 56-45-1      | L-Serine                                                         |    |
| P11 | 6893-26-1    | D-Glutamic acid                                                  |    |
| P12 | 1783-96-6    | D-Aspartic acid                                                  |   |
| P13 | 921-01-7     | D-Cysteine                                                       |  |
| P14 | 269726-82-1  | 3-Cyano-D- $\beta$ -homophenylalanine                            |  |
| P15 | 97233-92-6   | <i>N</i> <sup>ω</sup> -(4-Toluenesulfonyl)-D-arginine            |  |
| P16 | 111139-55-0  | 3-Benzothiényl-D-alanine                                         |  |
| P17 | 40332-58-9   | Pentafluoro-D-phenylalanine                                      |  |
| P18 | 270065-76-4  | 3-Trifluoromethyl-L- $\beta$ -homophenylalanine                  |  |

Supplementary Materials

|     |             |                                                                    |                                                                                      |
|-----|-------------|--------------------------------------------------------------------|--------------------------------------------------------------------------------------|
| P19 | 269726-73-0 | 3-Trifluoromethyl-D-β-homophenylalanine                            | 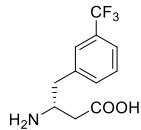  |
| P20 | 132388-58-0 | <i>N</i> <sup>t</sup> -Trityl-L-asparagine                         |   |
| P21 | 62561-74-4  | 4-Bromo-D-phenylalanine                                            |   |
| P22 | 274262-82-7 | 4-tert-Butyl-D-phenylalanine                                       |   |
| P23 | 110117-83-4 | 1-Methyl-D-tryptophan                                              |   |
| P24 | 5162-90-3   | 3-(2-Oxo-1,2-dihydro-4-quinoliny)alanine hydrochloride monohydrate |  |

\*N/A designates an empty well

## 5. Table S2. Arrangement of ncAAs Library

|   | 1       | 2       | 3       | 4       | 5       | 6       | 7       | 8       | 9        | 10       | 11       | 12       | 13       | 14       | 15       | 16       | 17       | 18       | 19       | 20       | 21       | 22       | 23       | 24       |
|---|---------|---------|---------|---------|---------|---------|---------|---------|----------|----------|----------|----------|----------|----------|----------|----------|----------|----------|----------|----------|----------|----------|----------|----------|
| P | P1      | P2      | P3      | P4      | P5      | P6      | P7      | P8      | P9       | P10      | P11      | P12      | P13      | P14      | P15      | P16      | P17      | P18      | P19      | P20      | P21      | P22      | P23      | P24      |
| O | O1      | O2      | O3      | O4      | O5      | O6      | O7      | O8      | O9       | O10<br>0 | O11<br>1 | O12<br>2 | O13<br>3 | O14<br>4 | O15<br>5 | O16<br>6 | O17<br>7 | O18<br>8 | O19<br>9 | O20<br>0 | O21<br>1 | O22<br>2 | O23<br>3 | O24<br>4 |
| N | N1      | N2      | N3      | N4      | N5      | N6      | N7      | N8      | N9       | N10      | N11      | N12      | N13      | N14      | N15      | N16      | N17      | N18      | N19      | N20      | N21      | N22      | N23      | N24      |
| M | M1<br>1 | M2<br>2 | M3<br>3 | M4<br>4 | M5<br>5 | M6<br>6 | M7<br>7 | M8<br>8 | GMM<br>L | M10<br>0 | M11<br>1 | M12<br>2 | M13<br>3 | M14<br>4 | M15<br>5 | M16<br>6 | M17<br>7 | M18<br>8 | M19<br>9 | M20<br>0 | M21<br>1 | M22<br>2 | M23<br>3 | M24<br>4 |
| L | L1      | L2      | L3      | L4      | L5      | L6      | L7      | L8      | L9       | L10      | L11      | L12      | L13      | L14      | L15      | L16      | L17      | L18      | L19      | L20      | L21      | L22      | L23      | L24      |
| K | K1      | K2      | K3      | K4      | K5      | K6      | K7      | K8      | K9       | K10      | K11      | K12      | K13      | K14      | K15      | K16      | K17      | K18      | K19      | K20      | K21      | K22      | K23      | K24      |
| J | J1      | J2      | J3      | J4      | J5      | J6      | J7      | J8      | J9       | J10      | J11      | J12      | J13      | J14      | J15      | J16      | J17      | J18      | J19      | J20      | J21      | J22      | J23      | J24      |
| I | I1      | I2      | I3      | I4      | I5      | I6      | I7      | I8      | I9       | I10      | I11      | I12      | I13      | I14      | I15      | I16      | I17      | I18      | I19      | I20      | I21      | I22      | I23      | I24      |
| H | H1      | H2      | H3      | H4      | H5      | H6      | H7      | H8      | H9       | H10      | H11      | H12      | H13      | H14      | H15      | H16      | H17      | H18      | H19      | H20      | H21      | H22      | H23      | H24      |
| G | G1      | G2      | G3      | G4      | G5      | G6      | G7      | G8      | G9       | G10<br>0 | G11<br>1 | G12<br>2 | G13<br>3 | G14<br>4 | G15<br>5 | G16<br>6 | G17<br>7 | G18<br>8 | G19<br>9 | G20<br>0 | G21<br>1 | G22<br>2 | G23<br>3 | G24<br>4 |
| F | F1      | F2      | F3      | F4      | F5      | F6      | F7      | F8      | F9       | F10      | F11      | F12      | F13      | F14      | F15      | F16      | F17      | F18      | F19      | F20      | F21      | F22      | F23      | F24      |
| E | E1      | E2      | E3      | E4      | E5      | E6      | E7      | E8      | E9       | E10      | E11      | E12      | E13      | E14      | E15      | E16      | E17      | E18      | E19      | E20      | E21      | E22      | E23      | E24      |
| D | D1      | D2      | D3      | D4      | D5      | D6      | D7      | D8      | D9       | D10      | D11      | D12      | D13      | D14      | D15      | D16      | D17      | D18      | D19      | D20      | D21      | D22      | D23      | D24      |
| C | C1      | C2      | C3      | C4      | C5      | C6      | C7      | C8      | C9       | C10      | C11      | C12      | C13      | C14      | C15      | C16      | C17      | C18      | C19      | C20      | C21      | C22      | C23      | C24      |
| B | B1      | B2      | B3      | B4      | B5      | B6      | B7      | B8      | B9       | B10      | B11      | B12      | B13      | B14      | B15      | B16      | B17      | B18      | B19      | B20      | B21      | B22      | B23      | B24      |
| A | A1      | A2      | A3      | A4      | A5      | A6      | A7      | A8      | A9       | A10      | A11      | A12      | A13      | A14      | A15      | A16      | A17      | A18      | A19      | A20      | A21      | A22      | A23      | A24      |

\*The wells labelled in red are used as controls (without ncAAs and IPTG); the wells without ncAAs but containing IPTG are labelled in green.
